# Supplementary material for: Effect of substituents and chain length in amino-1,4-naphthoquinones on glutathione-S-transferase inhibition: molecular docking and electrochemical perspectives: a structure–activity study
Source: Royal Society of Chemistry journal article supplement (doi:10.1039/d2nj04079d), 2022-01-01
Supplement: d2nj04079d1.pdf [file d2nj04079d1.pdf]

## Electronic Supplementary Information for New Journal of Chemistry

### Effect of substituent and chain length in amino-1,4-naphthoquinones on glutathione-S-transferase inhibition: molecular docking and electrochemical perspectives: A structure-activity study.

Judith Faúndes<sup>a</sup>, Michelle Muñoz<sup>a</sup>, Pilar Morales<sup>a</sup>, F. Tasca<sup>b</sup>, César Zúñiga Loyola<sup>b</sup>, Mario Faúndez<sup>c</sup>, Carolina Mascayano<sup>a\*</sup>,  
Juana A. Ibacache<sup>a\*</sup>

<sup>a</sup> Departamento de Ciencias del Ambiente, Facultad de Química y Biología, Universidad de Santiago de Chile, Casilla 40, Correo 33, Sucursal Matucana, Santiago 9170022, Chile.

<sup>b</sup> Departamento de Química de Los Materiales, Facultad de Química y Biología, Universidad de Santiago de Chile, Casilla 40, Correo 33, Sucursal Matucana, Santiago 9170022, Chile.

<sup>c</sup> Pontificia Universidad Católica de Chile, Facultad de Química, Departamento de Farmacia, Laboratorio de Toxicología, Vicuña Mackenna 4860, 7820436, Macul, Santiago, Chile.

\*Corresponding author: [juana.ibacache.r@usach.cl](mailto:juana.ibacache.r@usach.cl), [carolina.mascayano@usach.cl](mailto:carolina.mascayano@usach.cl)

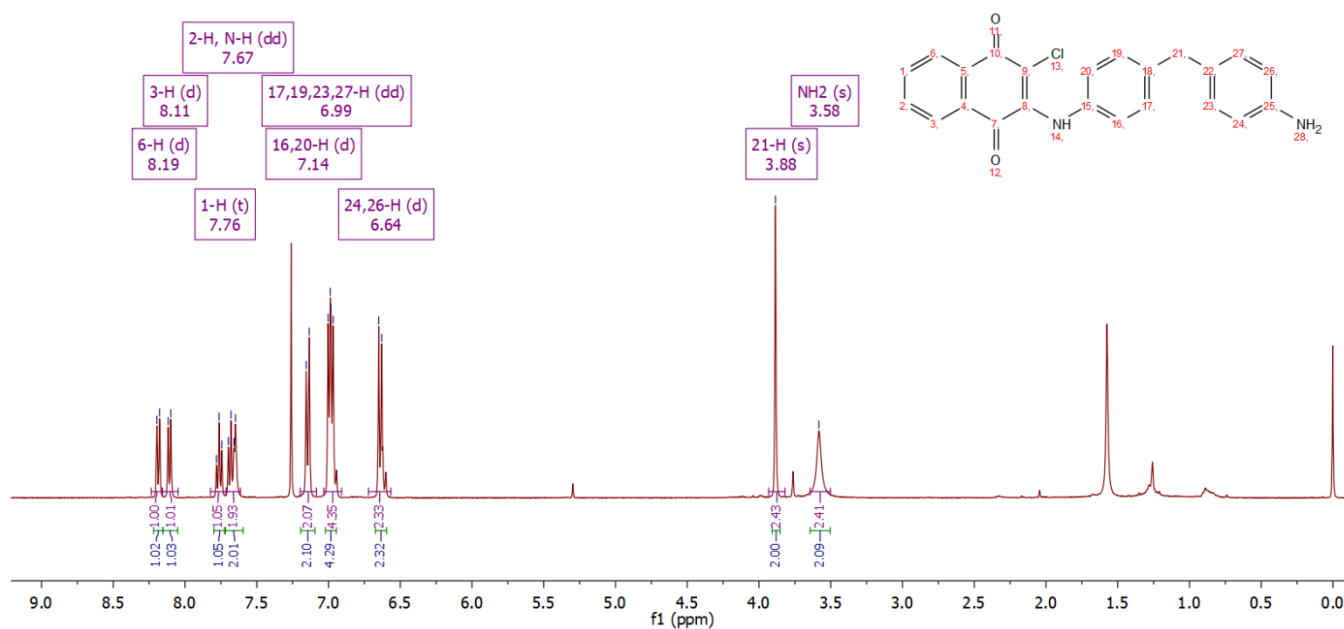

Figure S1. <sup>1</sup>H-NMR monoamination product **8** in CDCl<sub>3</sub>.

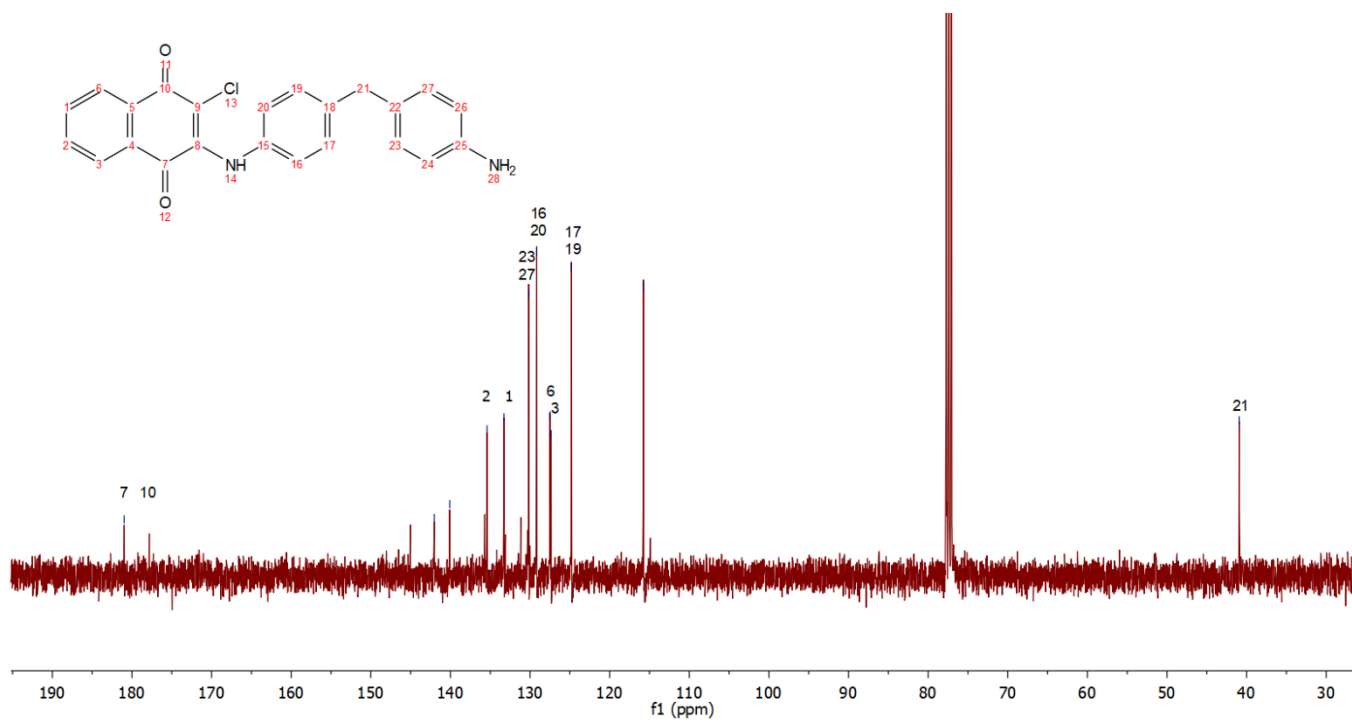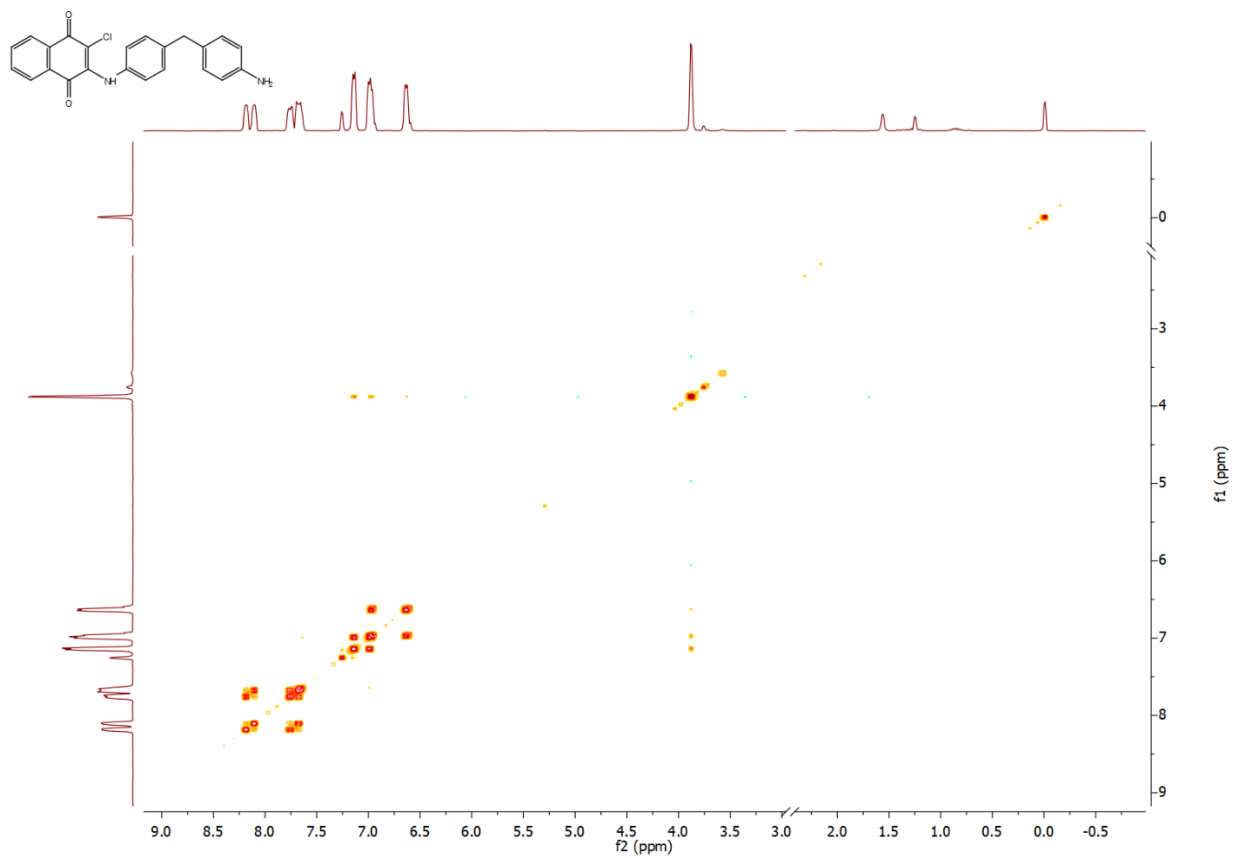

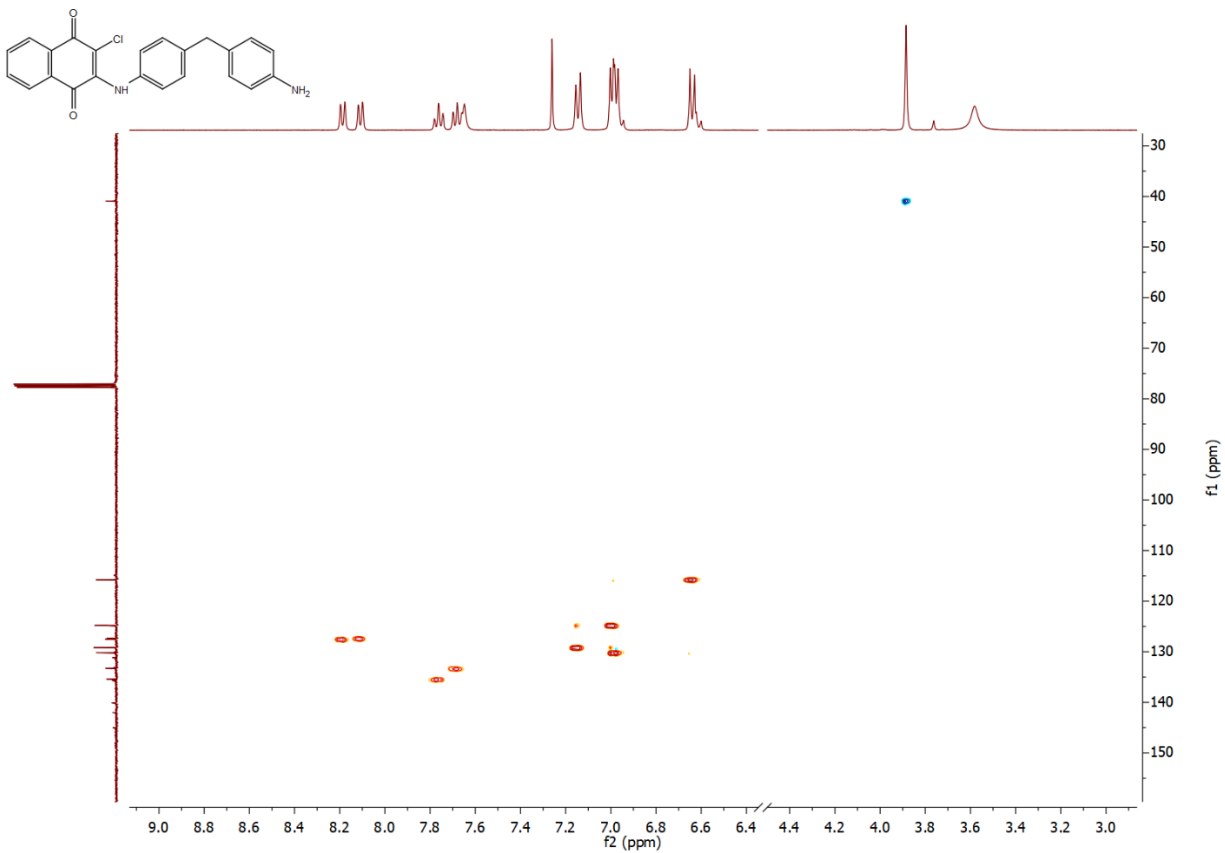

Figure S4. HSQC-NMR monoamination product **8** in  $\text{CDCl}_3$ .

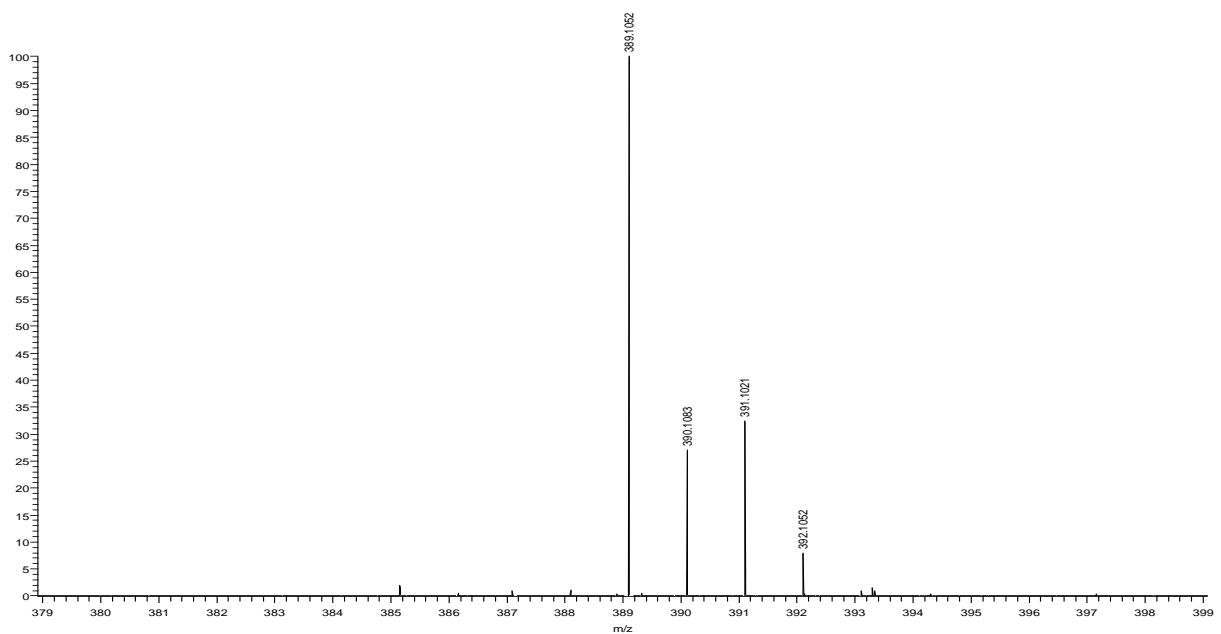

Figure S5. HRMS- $[\text{H}]^+$  monoamination product **8**.

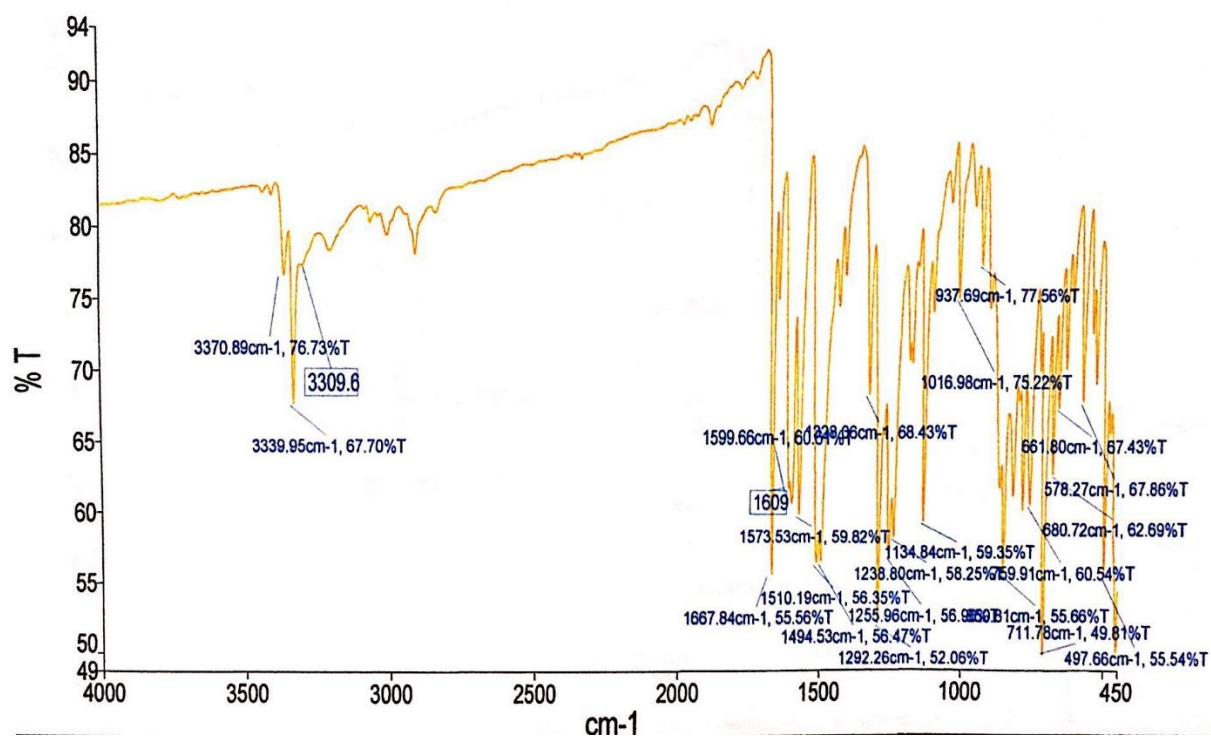

Figure S6. FT-IR product 8 in solid.

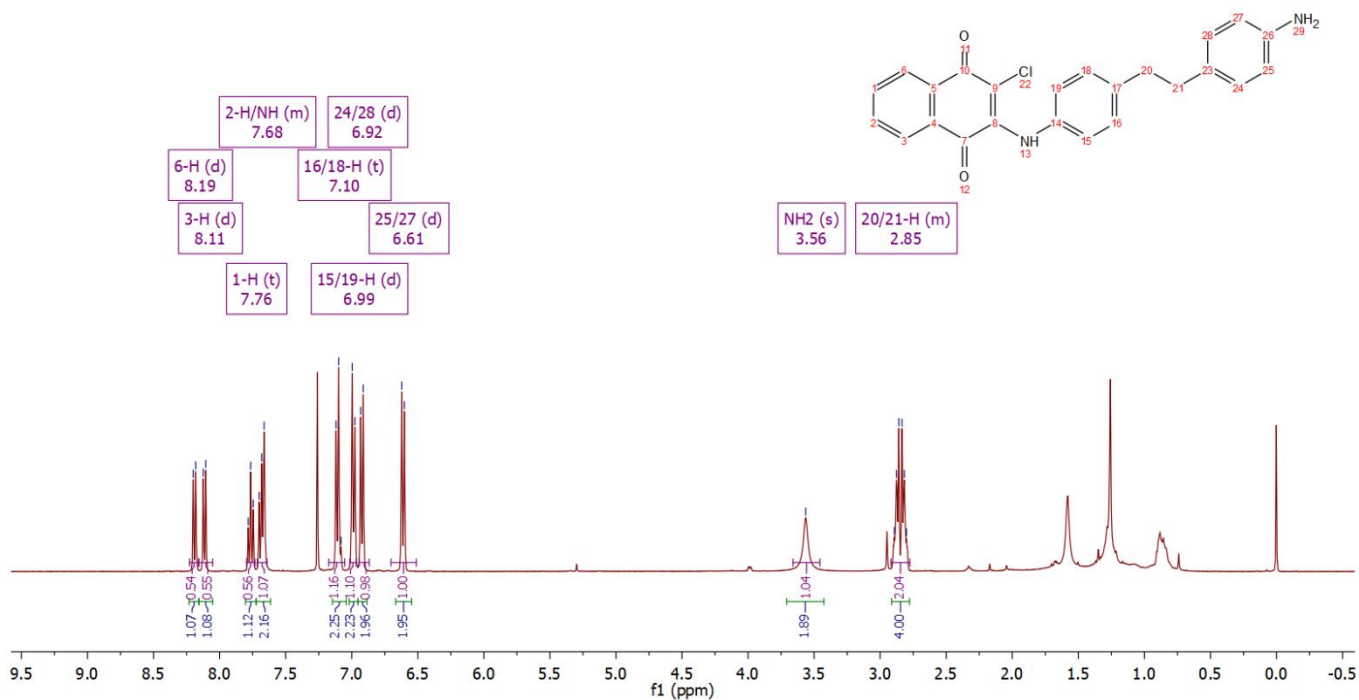

Figure S7.  $^1\text{H-NMR}$  monoamination product 9 in  $\text{CDCl}_3$ .

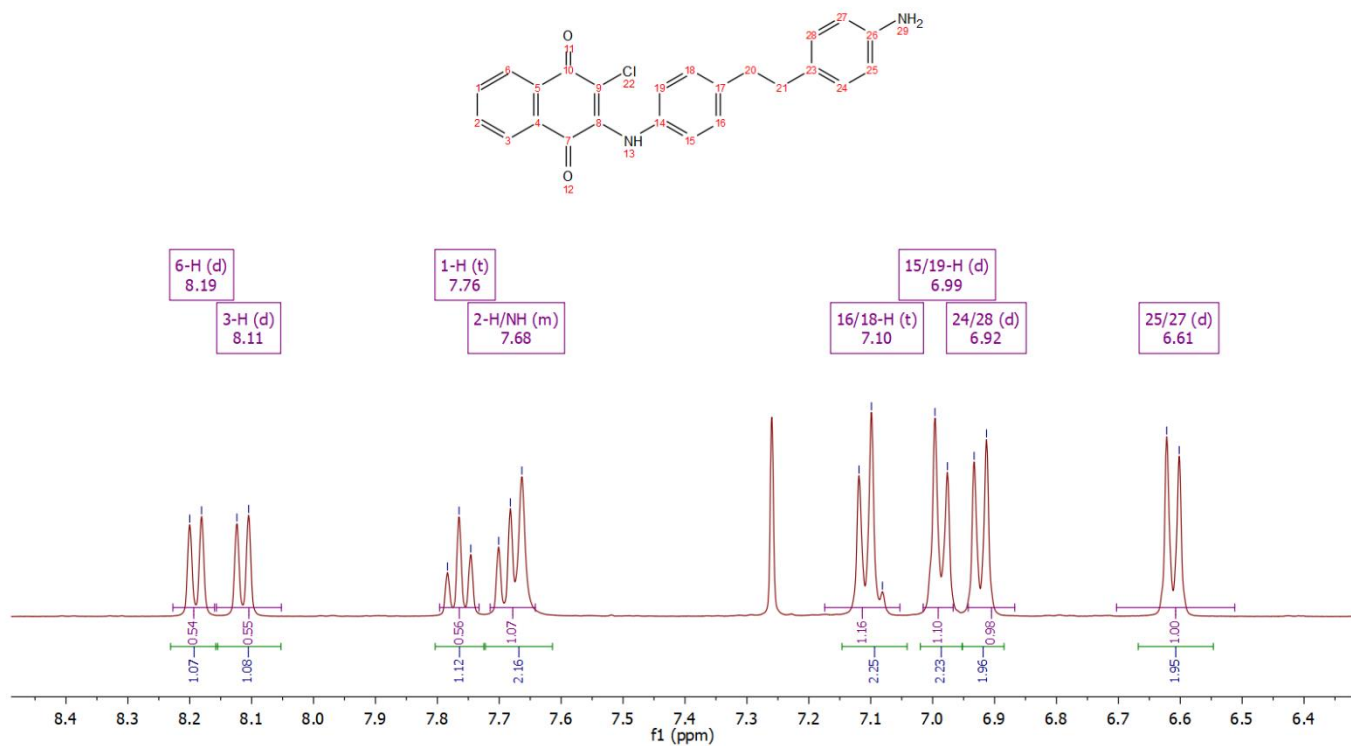

Figure S7A. Extended <sup>1</sup>H-NMR monoamination product 9 in CDCl<sub>3</sub>.

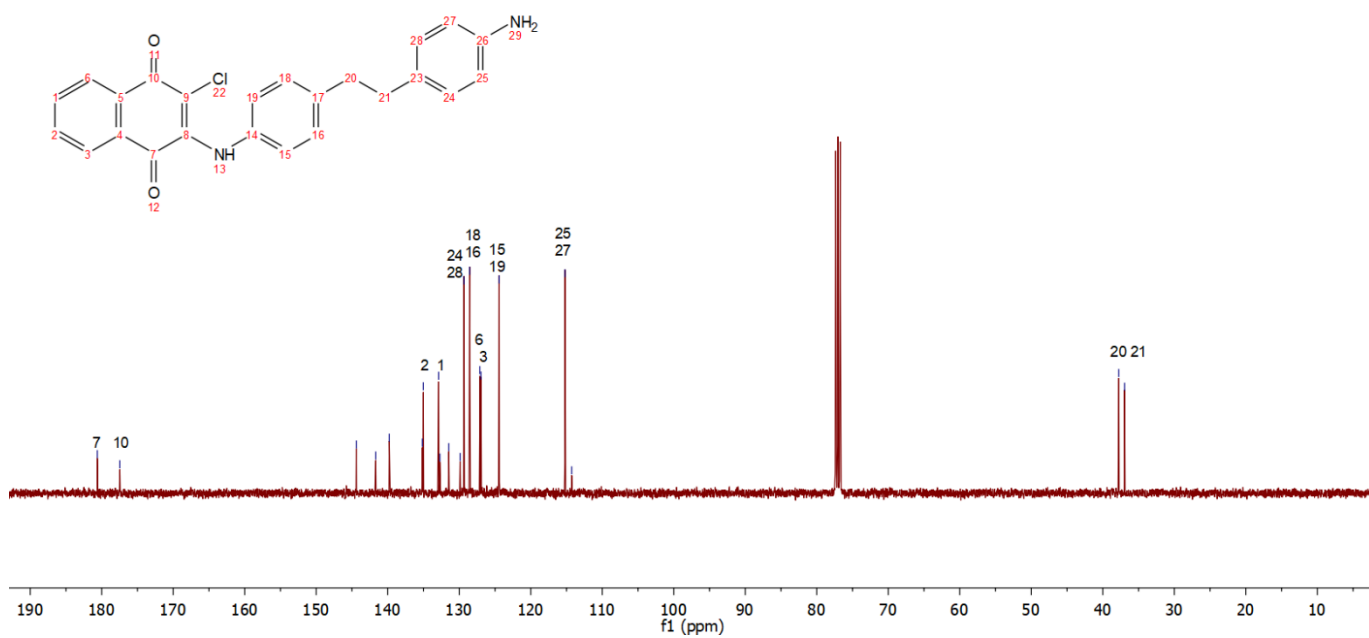

Figure S7B. <sup>13</sup>C-NMR monoamination product 9 in CDCl<sub>3</sub>.

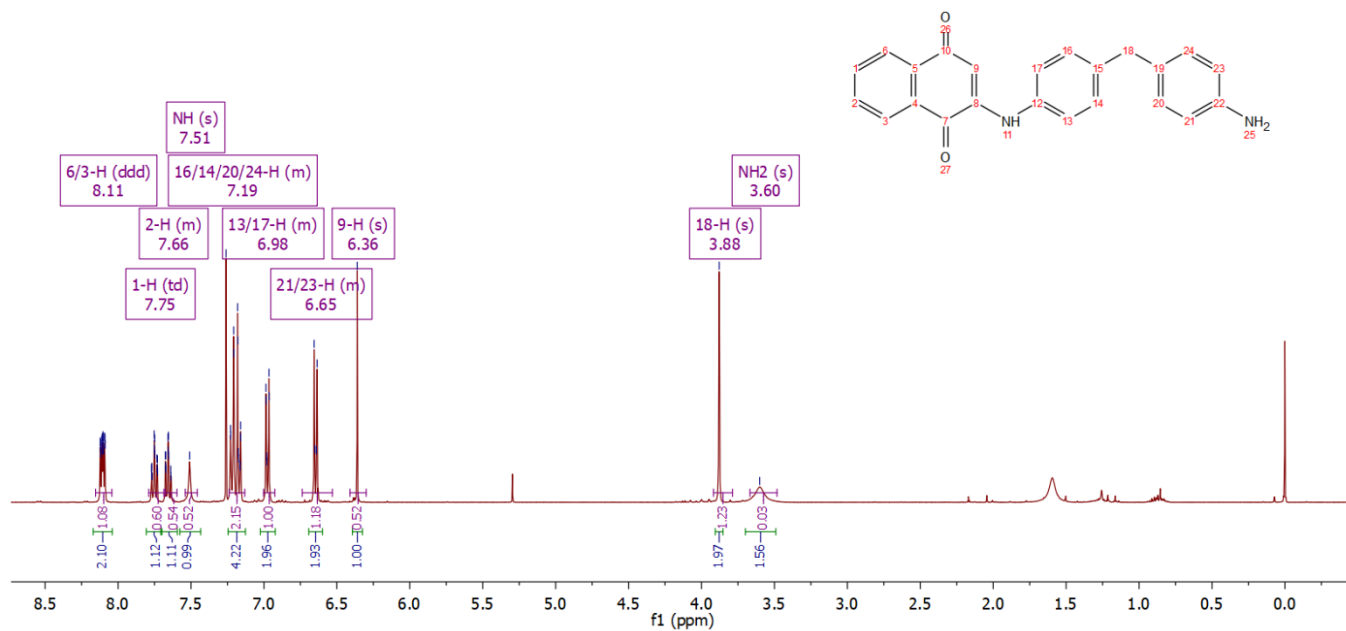

Figure S8. <sup>1</sup>H-NMR monoamination product **10** in CDCl<sub>3</sub>.

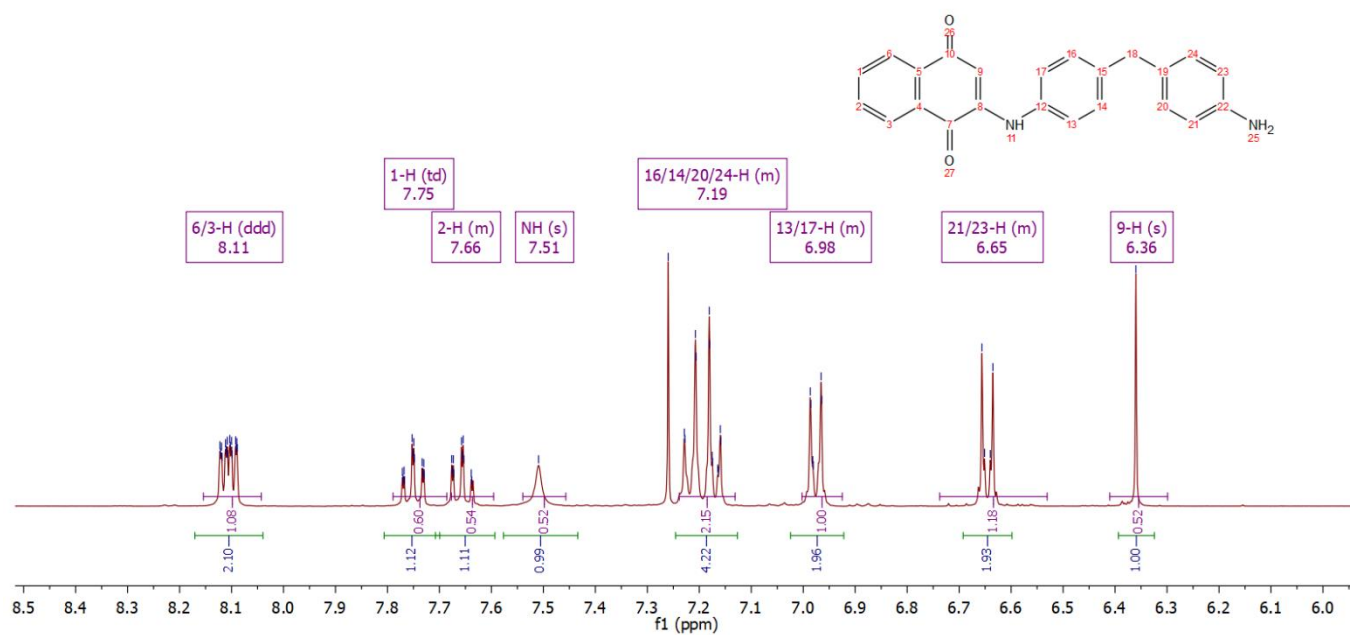

Figure S8A. Extended <sup>1</sup>H-NMR monoamination product **10** in CDCl<sub>3</sub>.

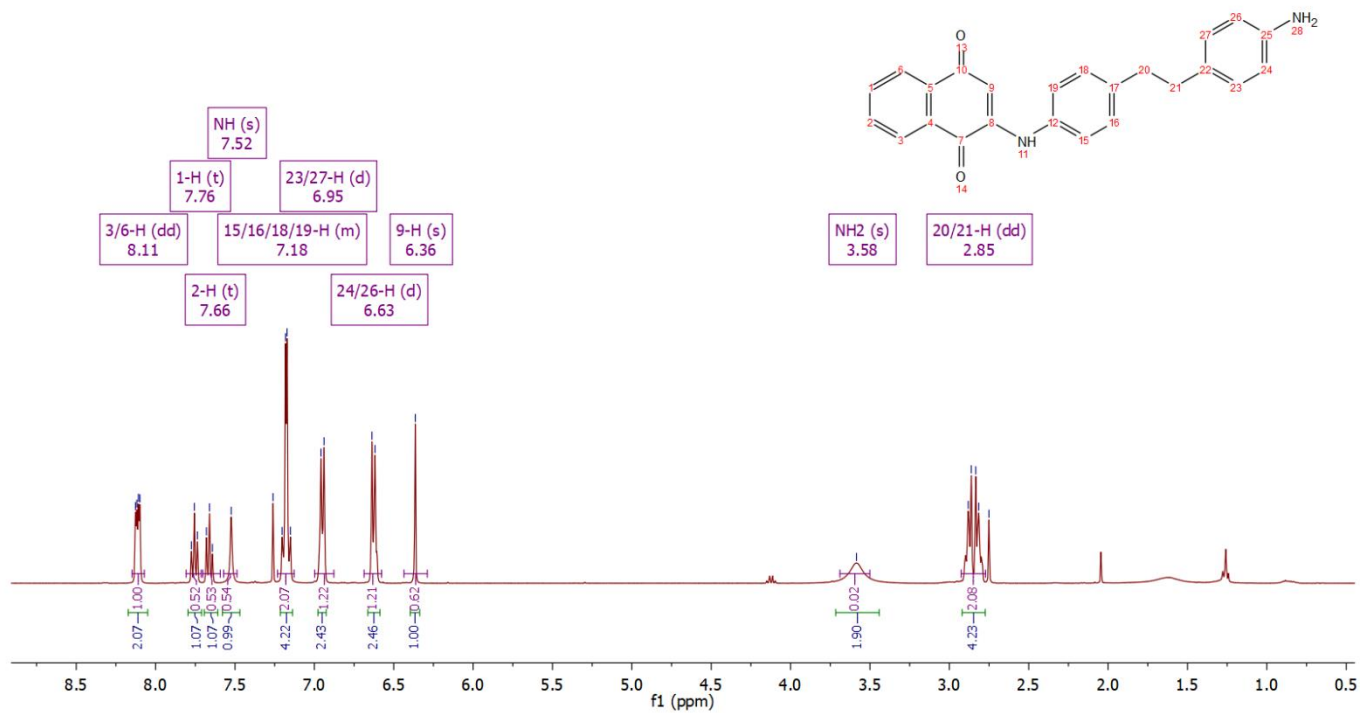

Figure S9. <sup>1</sup>H-NMR monoamination product **11** in CDCl<sub>3</sub>.

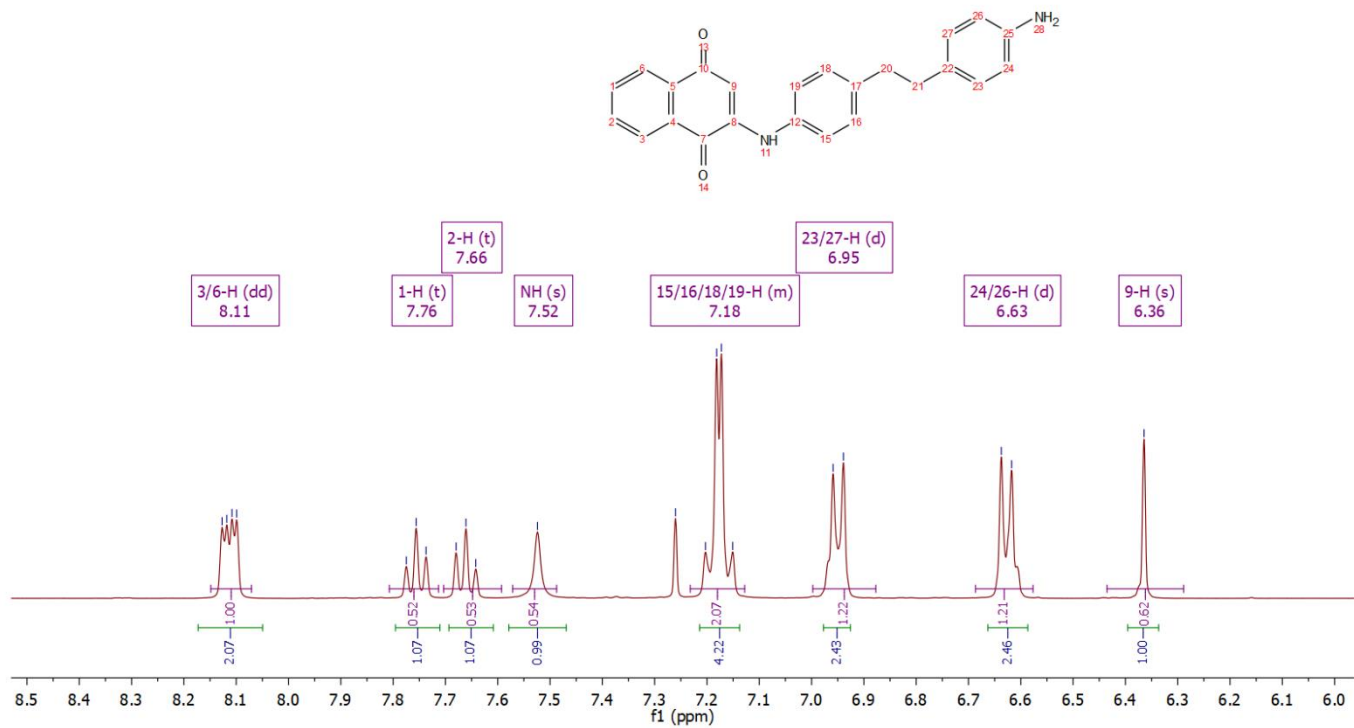

Figure S9A. Extended <sup>1</sup>H-NMR monoamination product **11** in CDCl<sub>3</sub>.

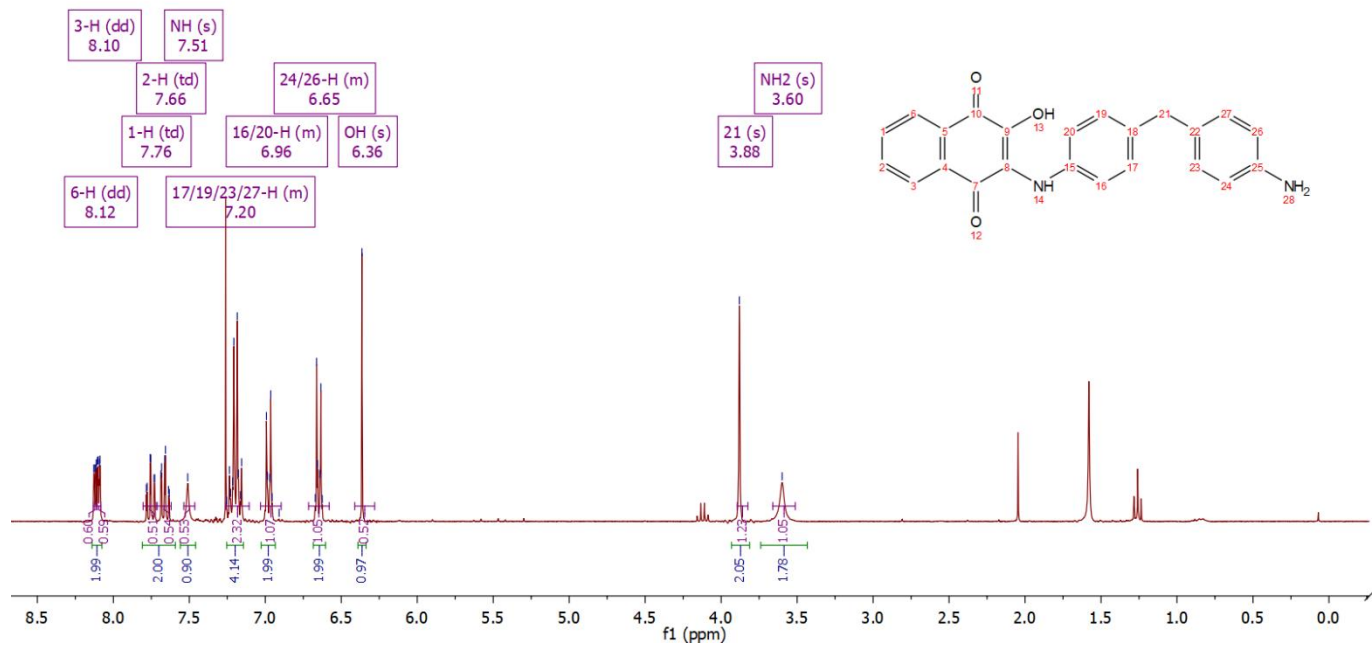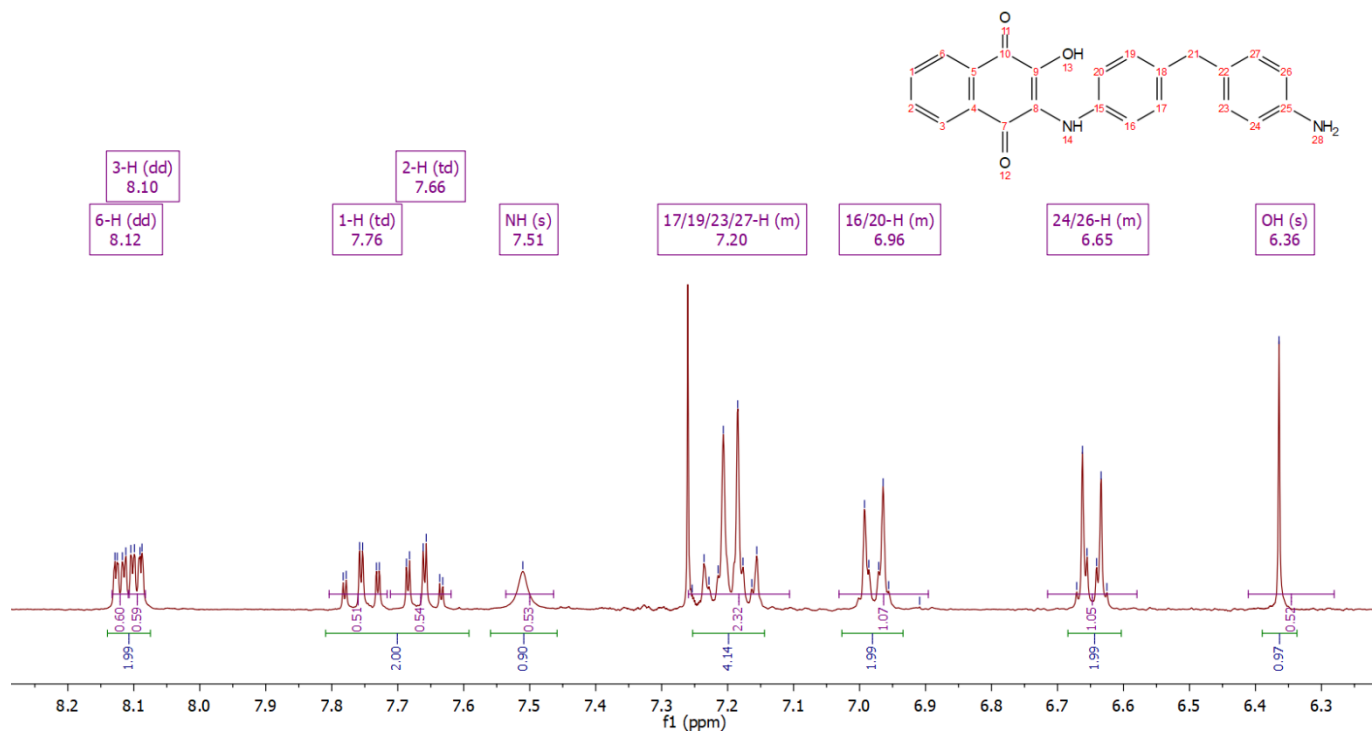



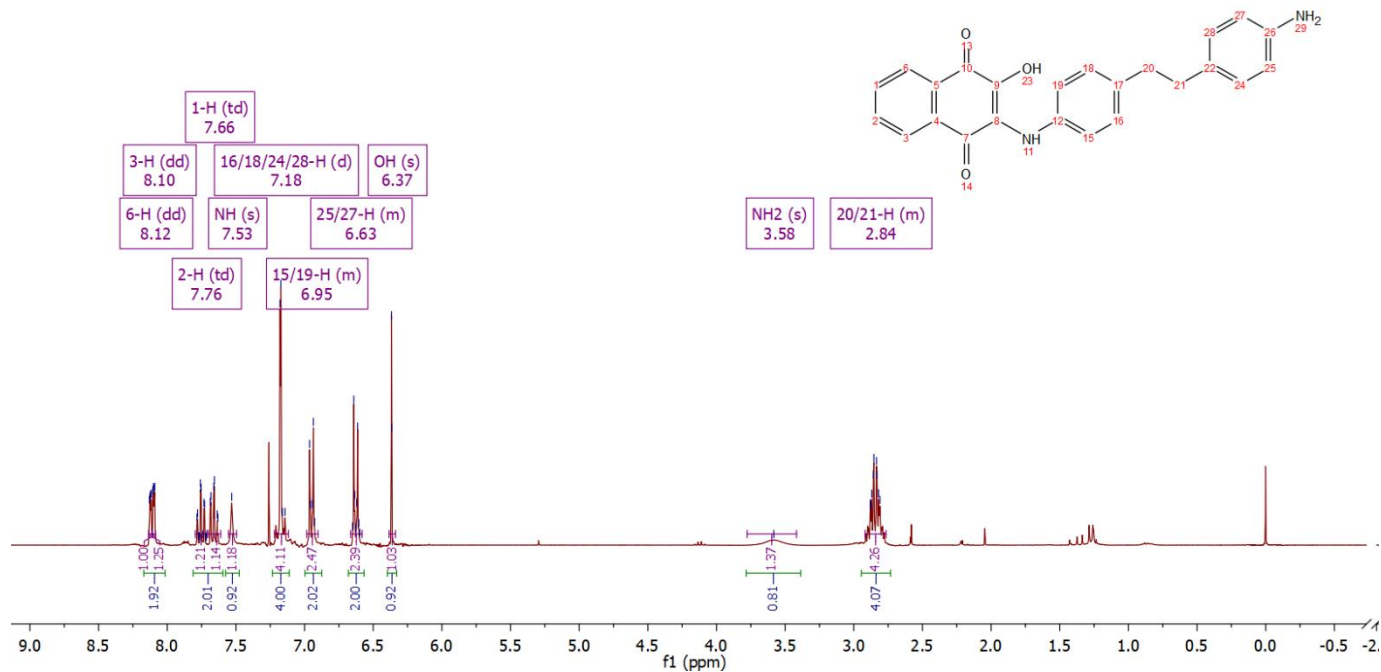

Figure S11. <sup>1</sup>H-NMR monoamination product **13** in CDCl<sub>3</sub>.

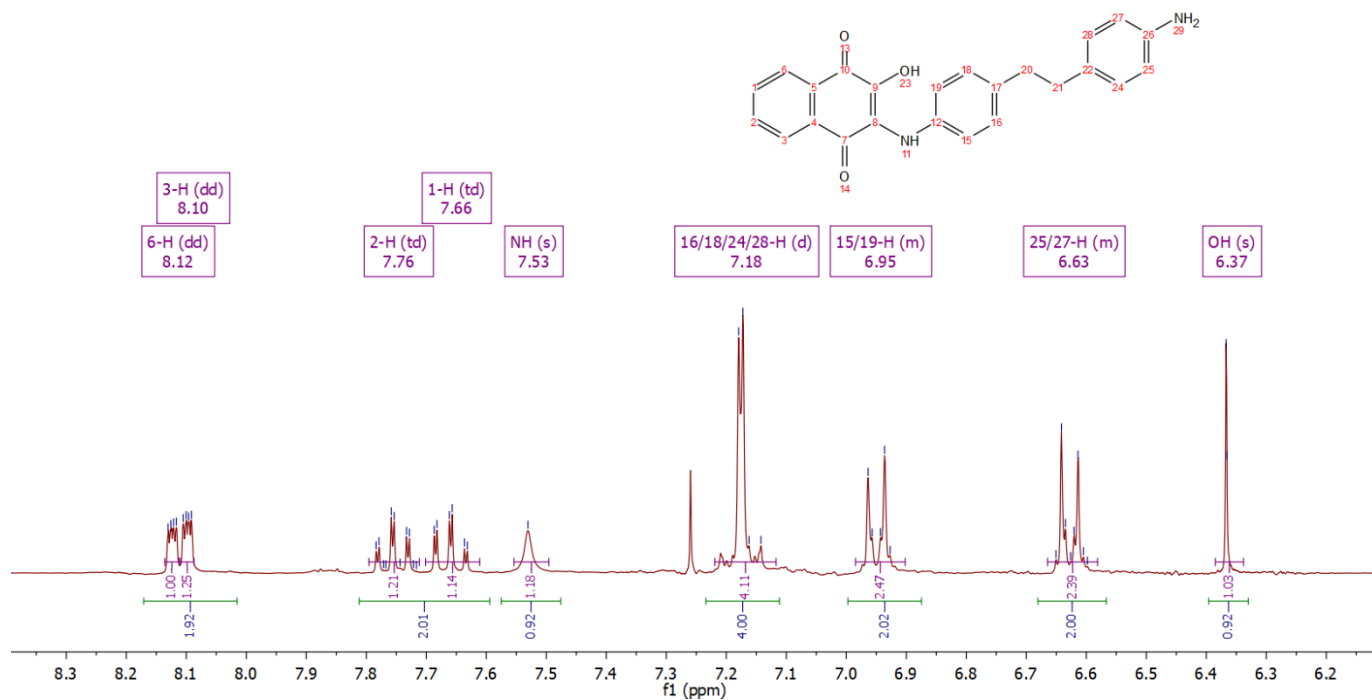

Figure S11A. Extended <sup>1</sup>H-NMR monoamination product **13** in CDCl<sub>3</sub>.

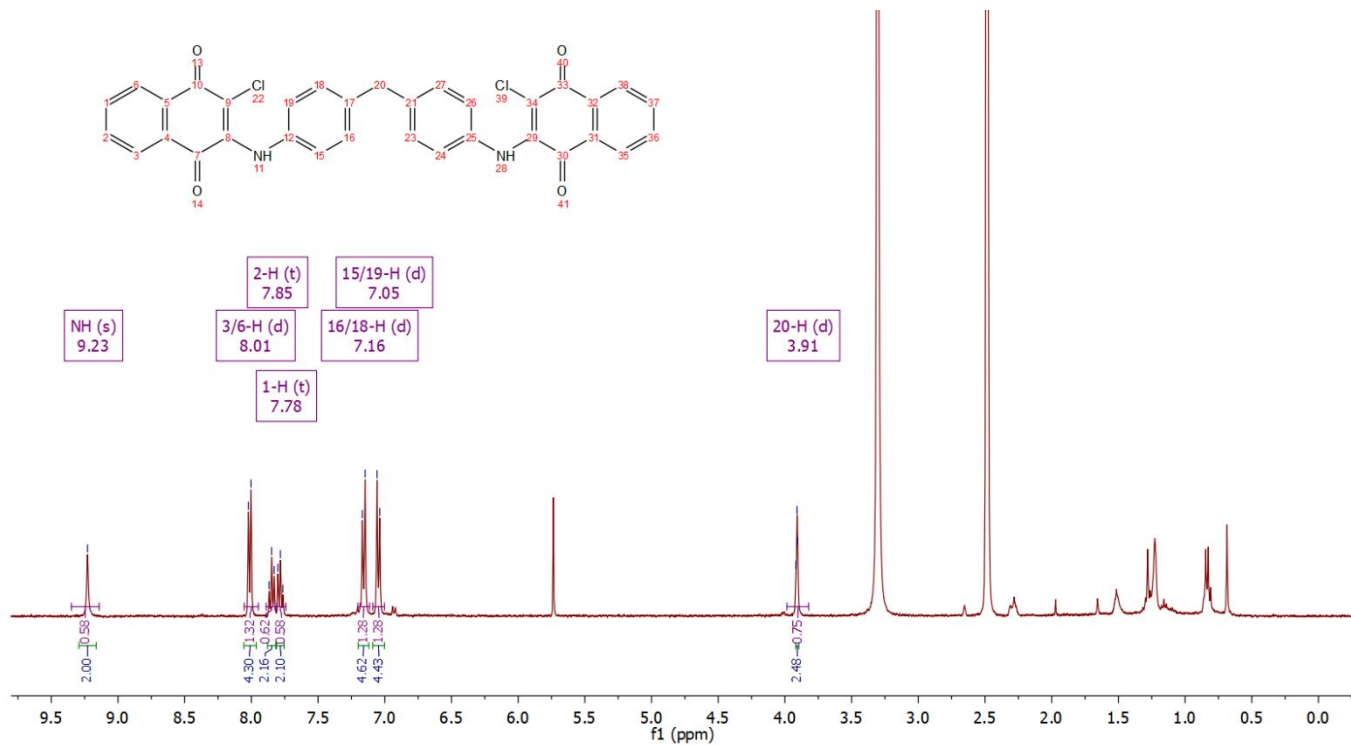

Figure S12. <sup>1</sup>H-NMR homodimer **14** in DMSO.

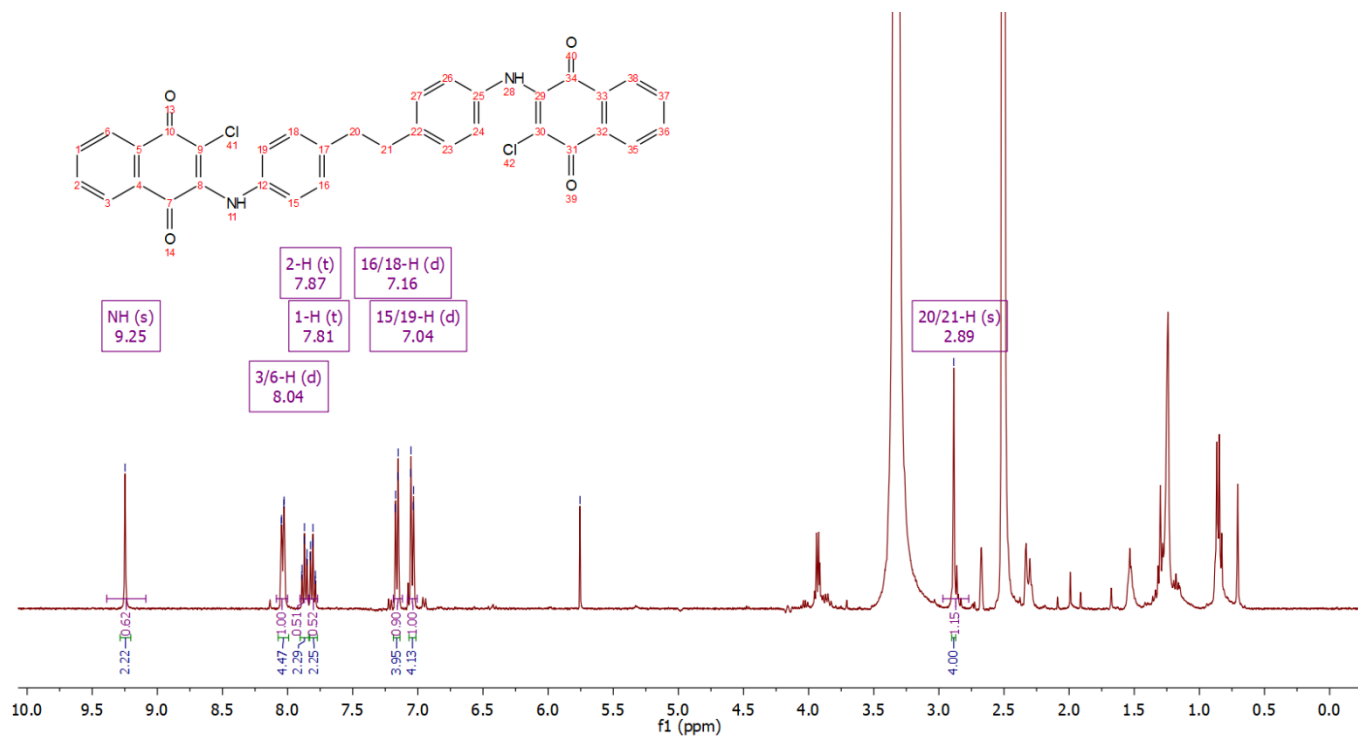

Figure S13. <sup>1</sup>H-NMR homodimer **15** in DMSO.

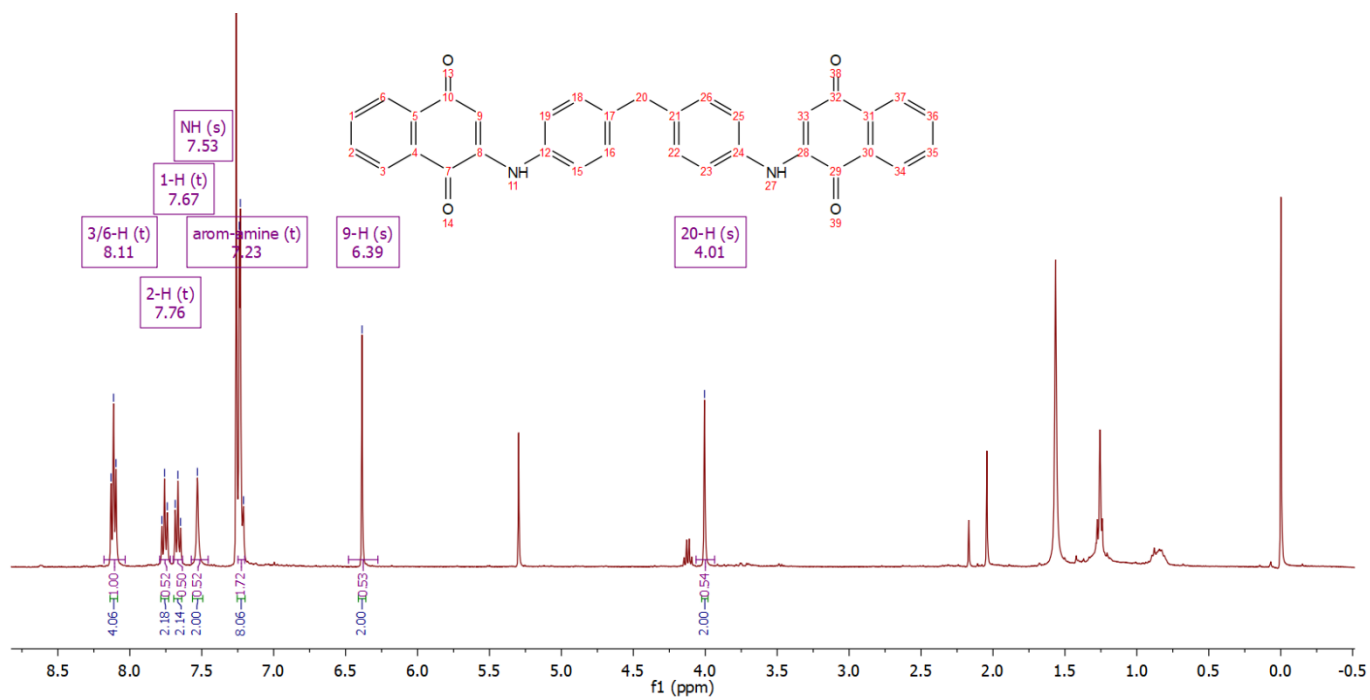

Figure S14.  $^1\text{H-NMR}$  homodimer **16** in  $\text{CDCl}_3$ .

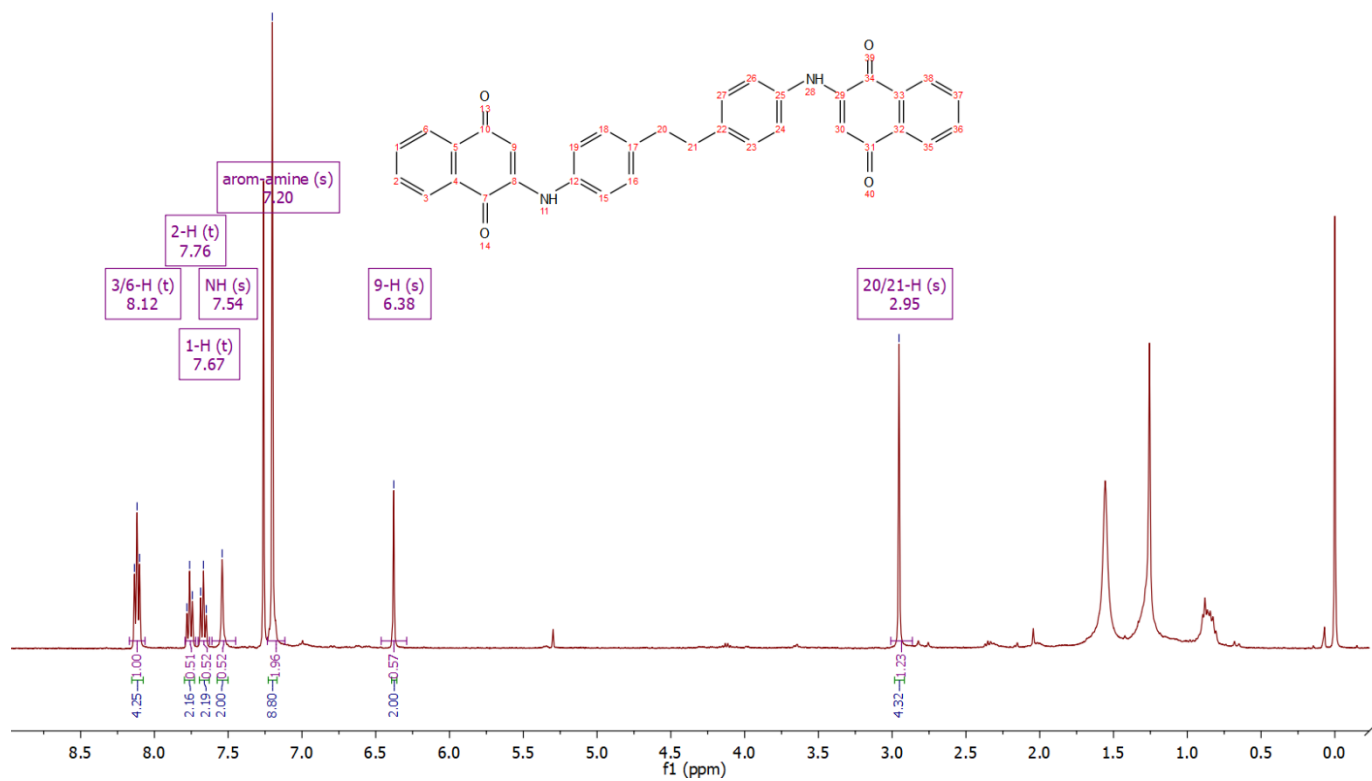

Figure S15.  $^1\text{H-NMR}$  homodimer **17** in  $\text{CDCl}_3$ .

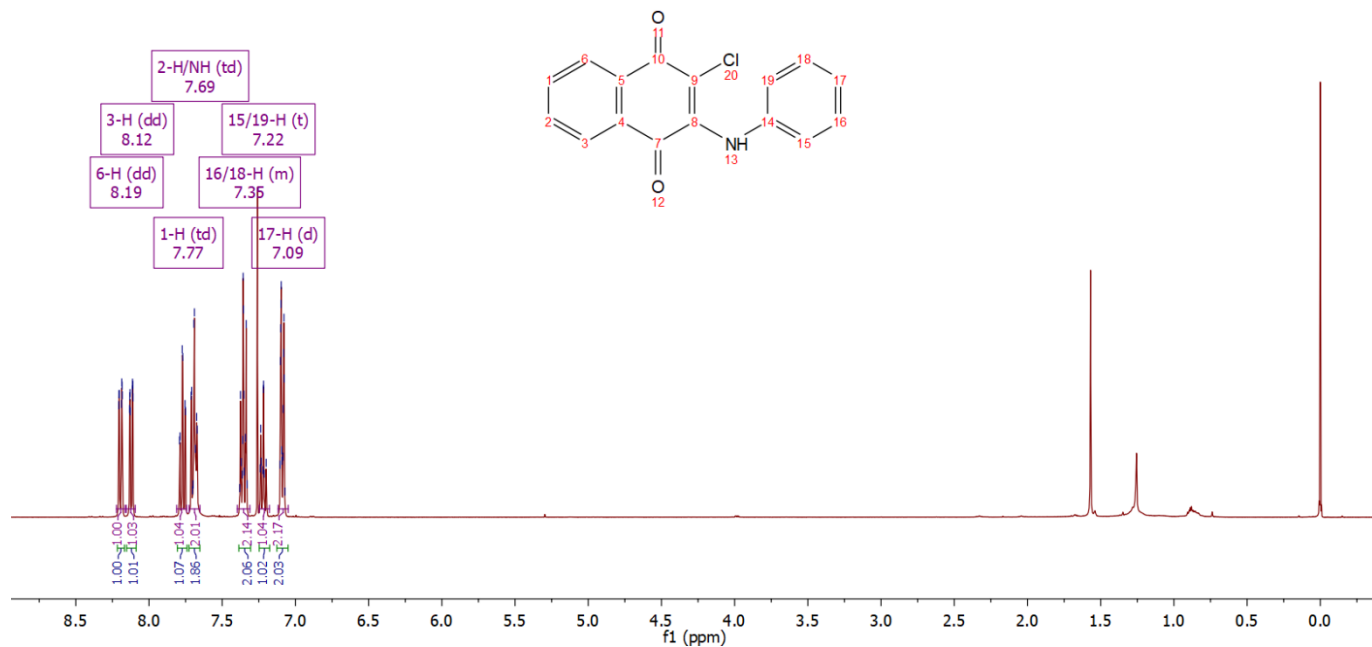

Figure S16.  $^1\text{H-NMR}$  pharmacophore **18** in  $\text{CDCl}_3$ .

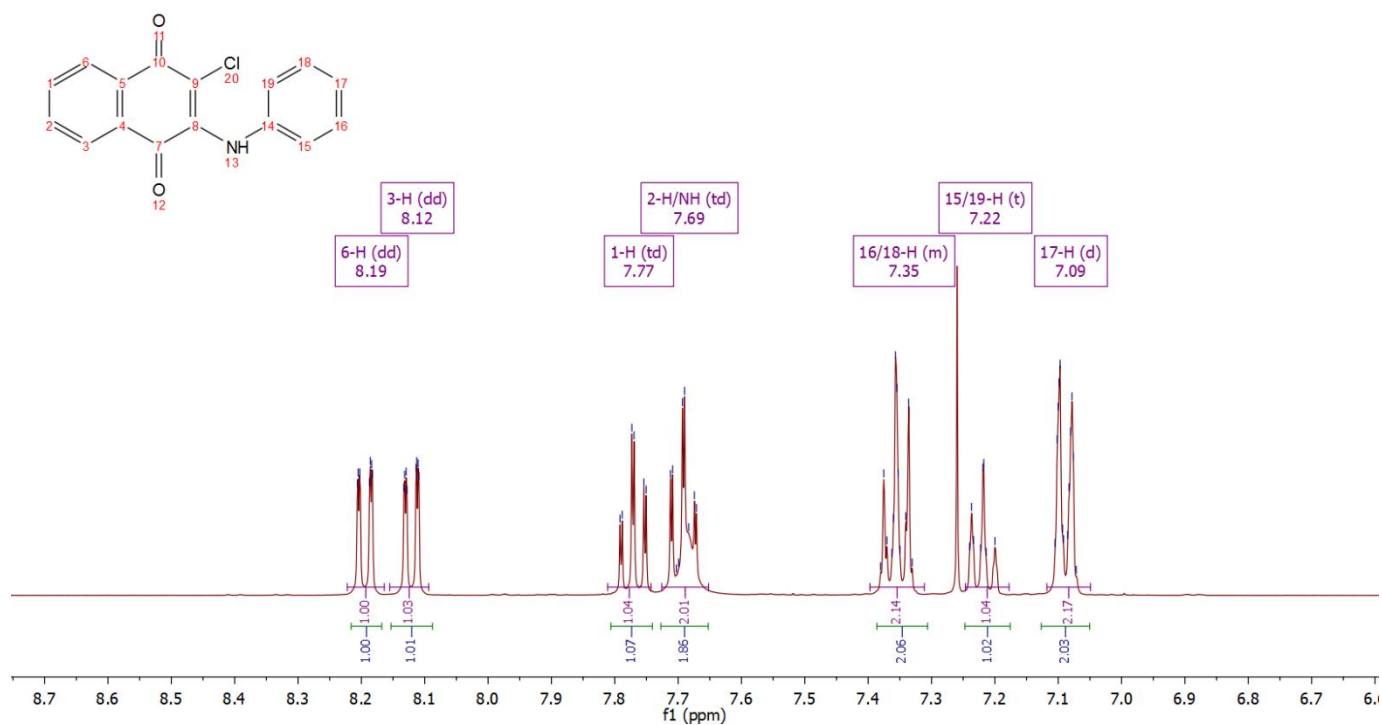

Figure S16A. Extended  $^1\text{H-NMR}$  pharmacophore **18** in  $\text{CDCl}_3$ .

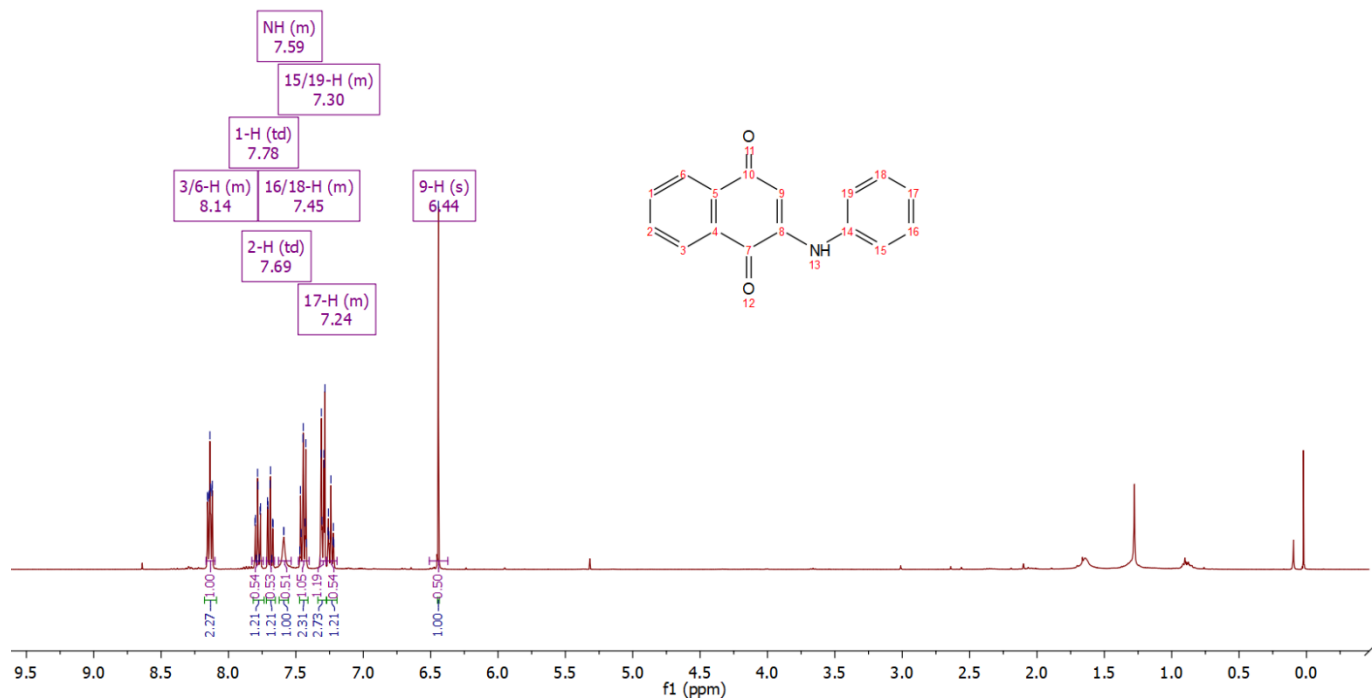

Figure S17.  $^1\text{H-NMR}$  pharmacophore 19 in  $\text{CDCl}_3$ .

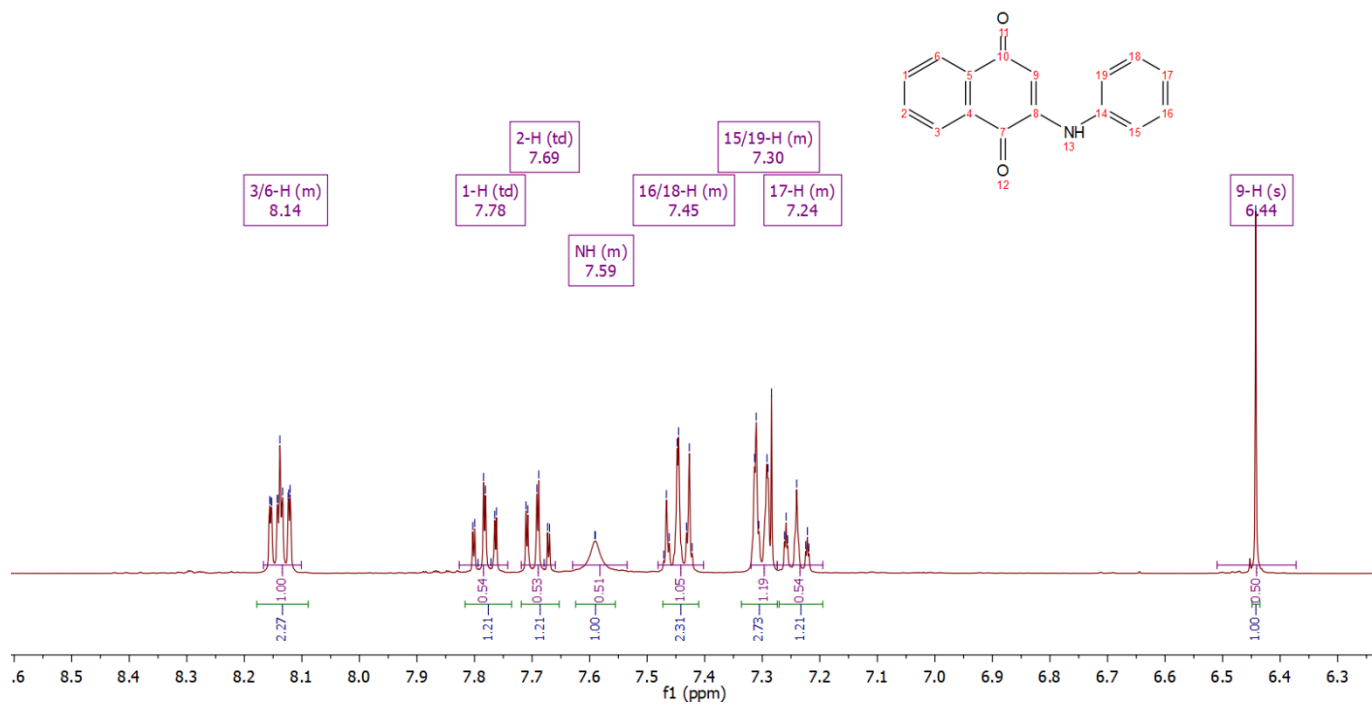

Figure S17A. Extended  $^1\text{H-NMR}$  pharmacophore 19 in  $\text{CDCl}_3$ .

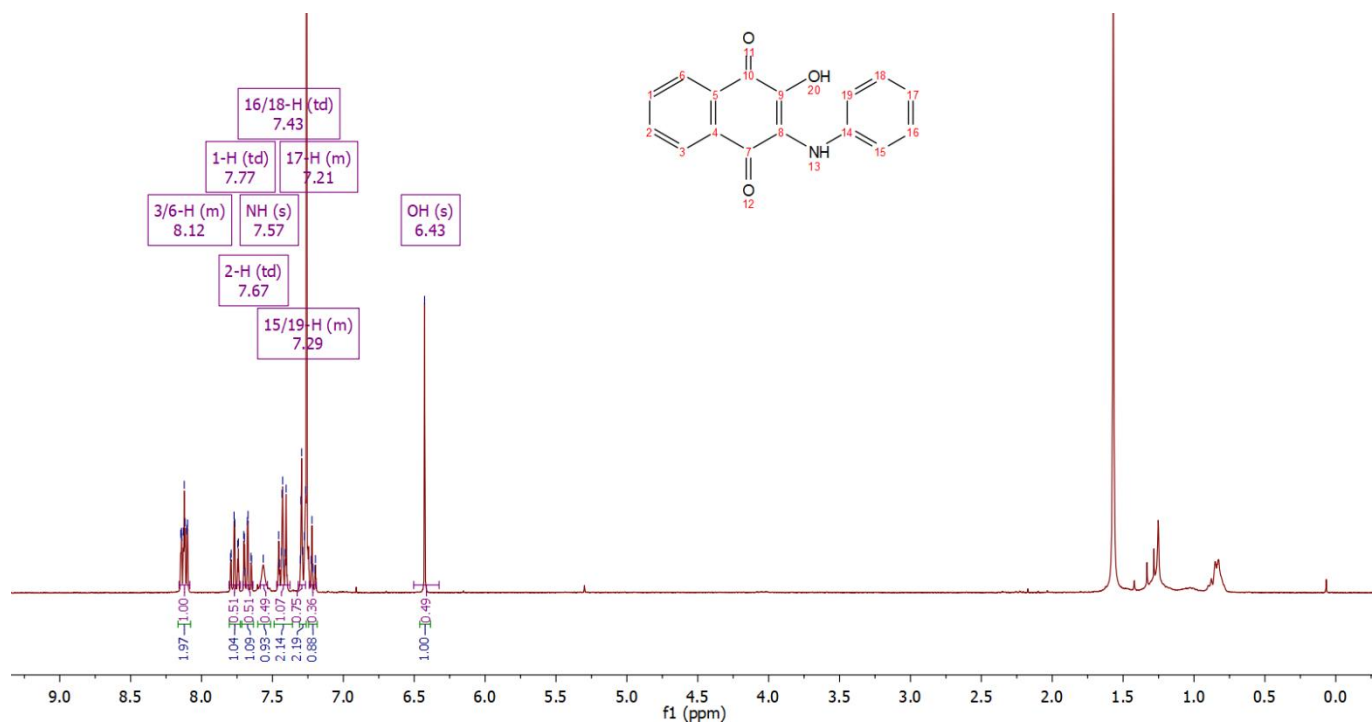

Figure S18.  $^1\text{H-NMR}$  pharmacophore **20** in  $\text{CDCl}_3$ .

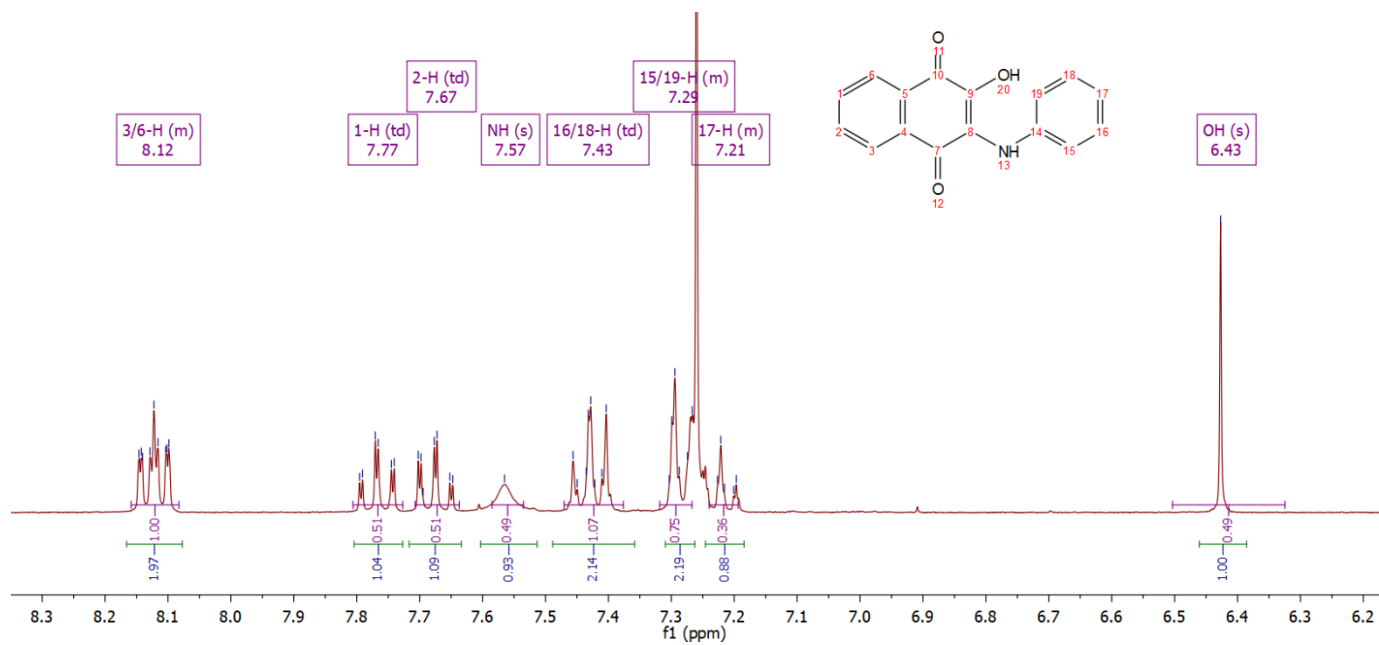

Figure S18A. Extended  $^1\text{H-NMR}$  pharmacophore **20** in  $\text{CDCl}_3$ .

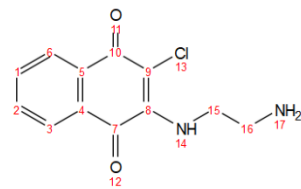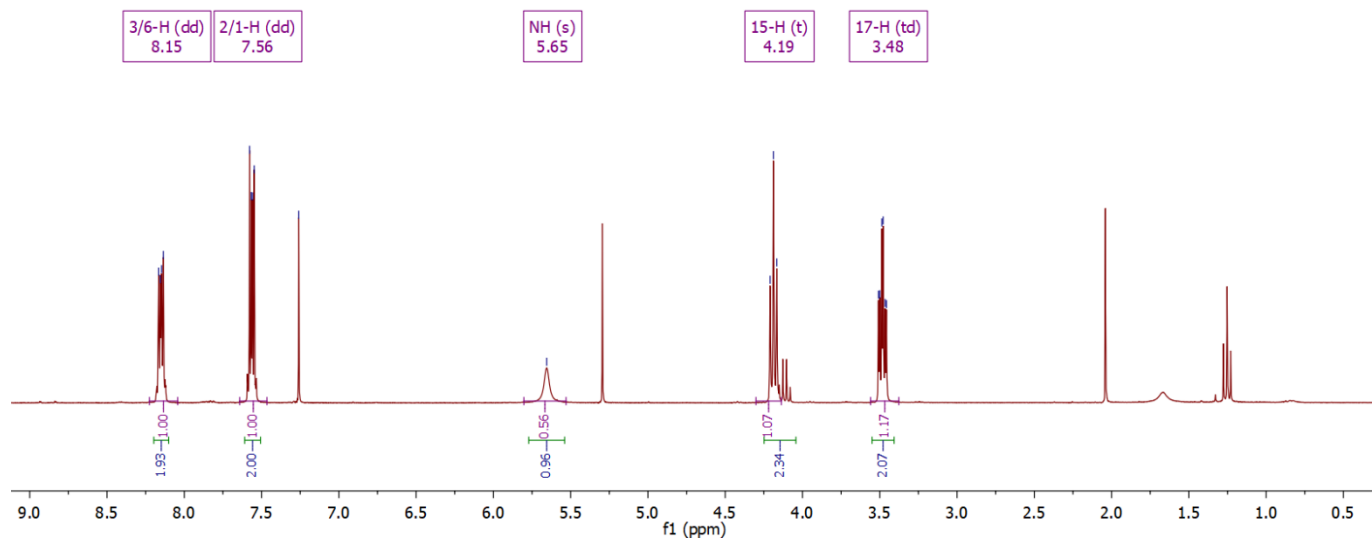

Figure S19. <sup>1</sup>H-NMR monoamination product **21** in CDCl<sub>3</sub>.

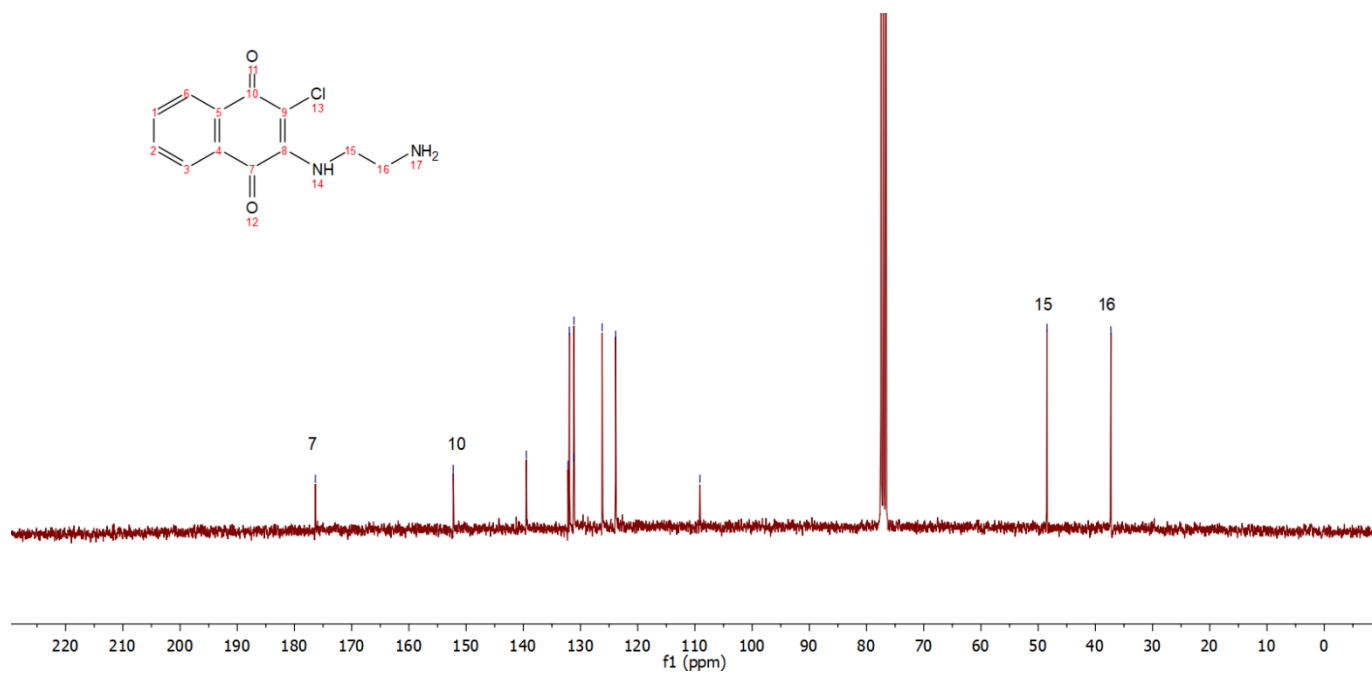

Figure S19A. <sup>13</sup>C-NMR monoamination product **21** in CDCl<sub>3</sub>.

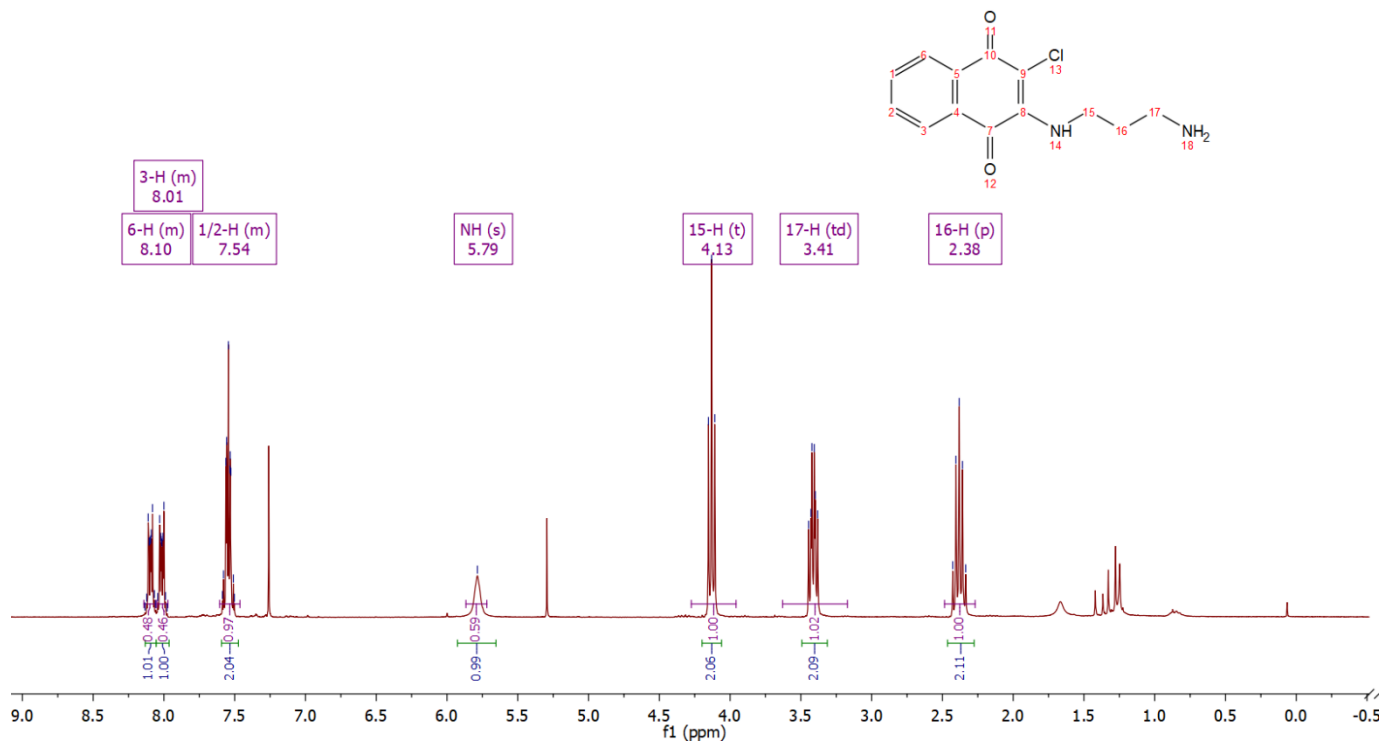

Figure S20. <sup>1</sup>H-NMR monoamination product **22** in CDCl<sub>3</sub>.

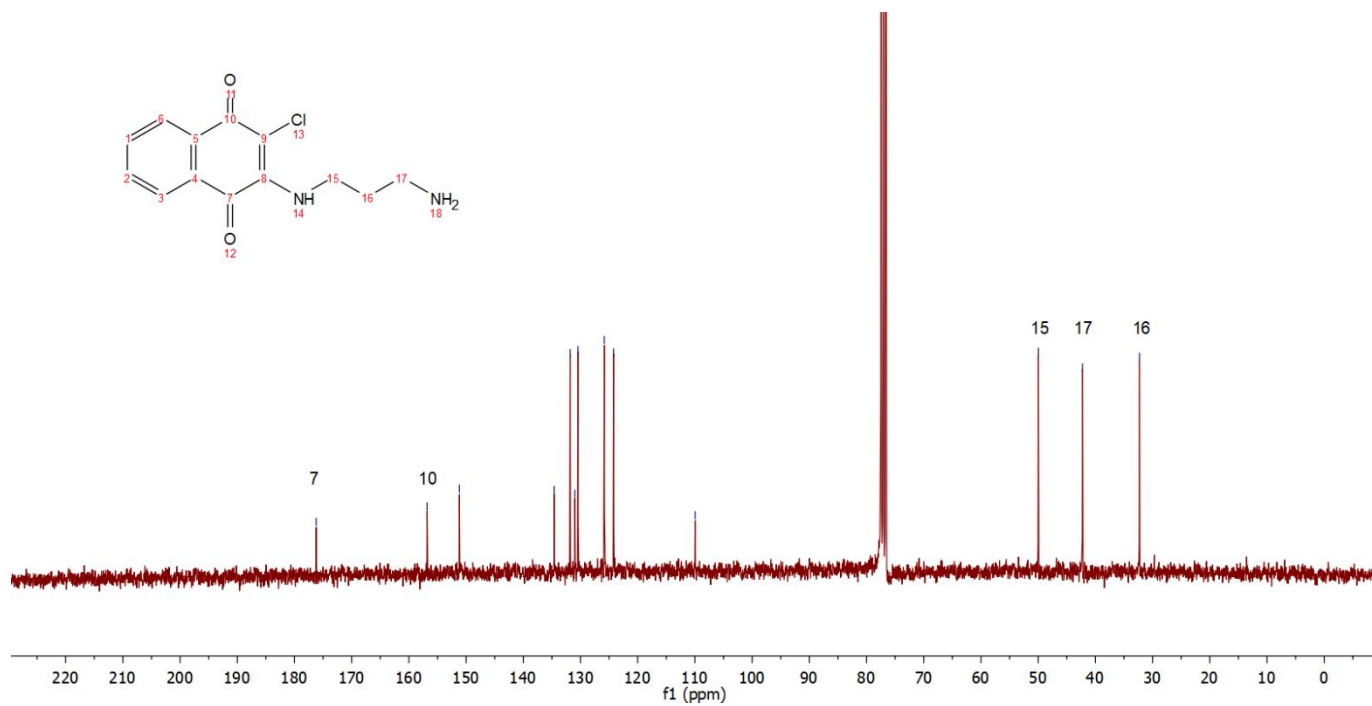

Figure S20A. <sup>13</sup>C-NMR monoamination product **22** in CDCl<sub>3</sub>.



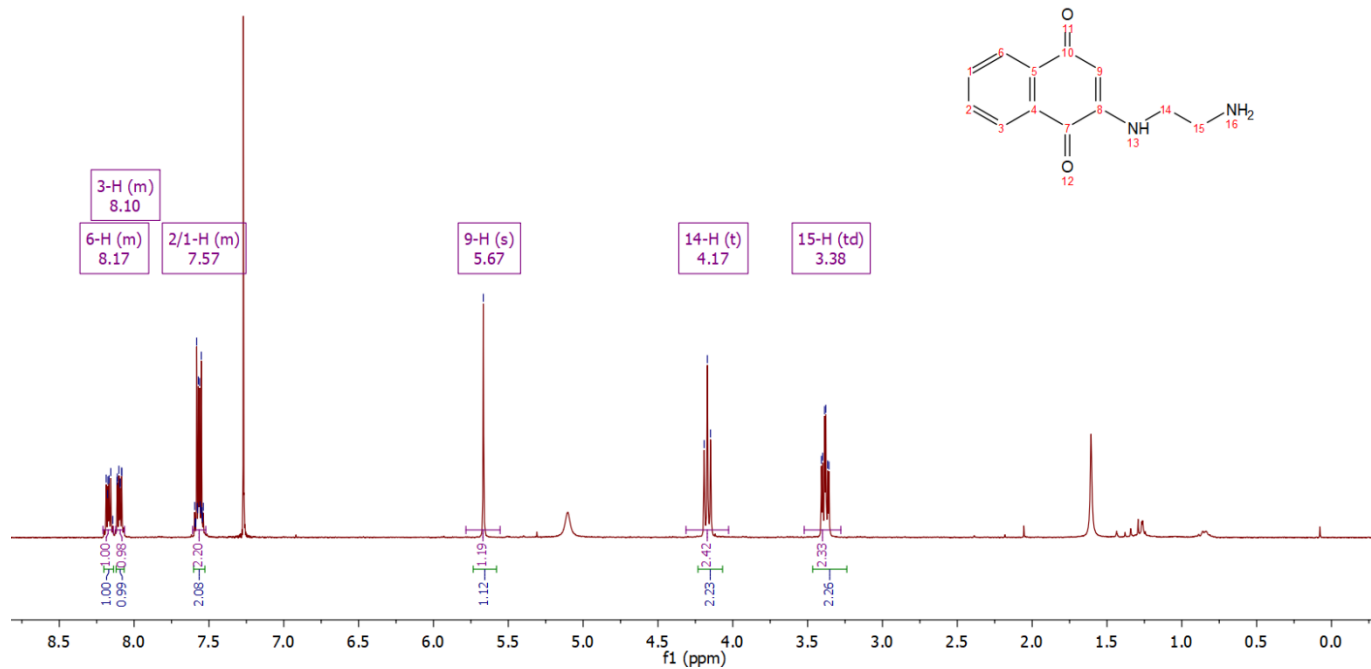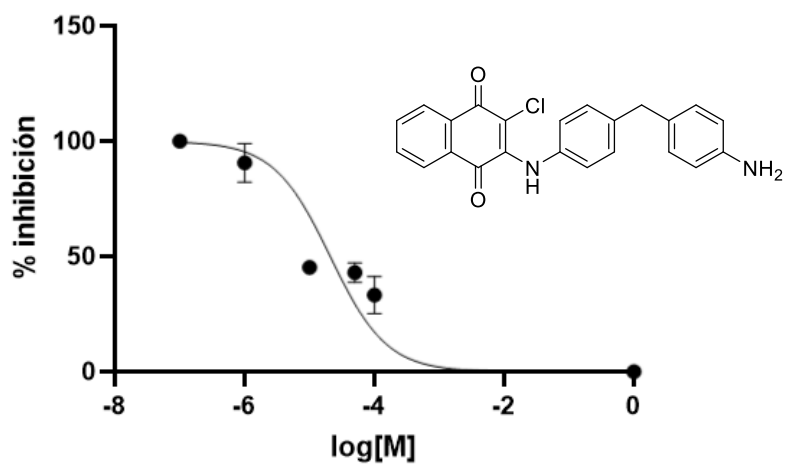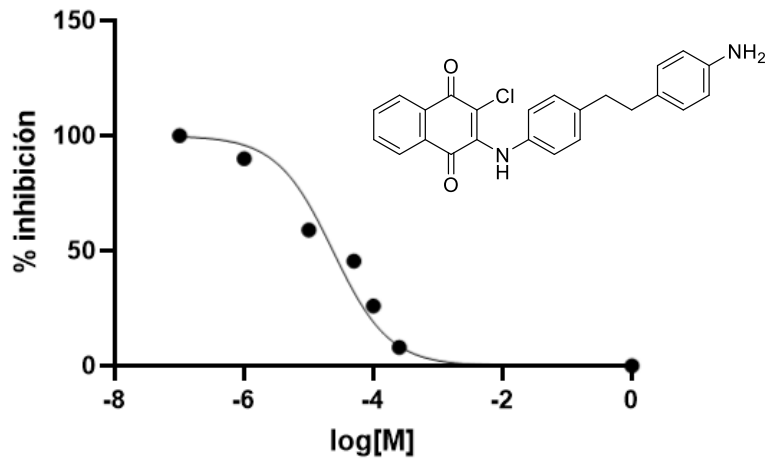

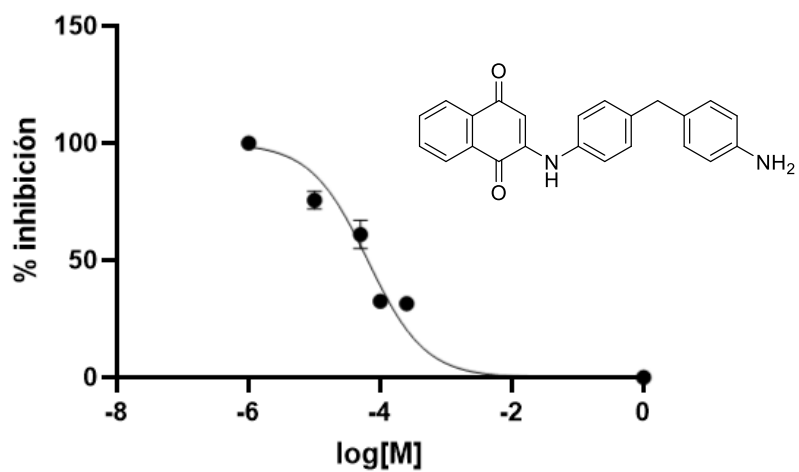

Figure S24. Curve dose-response monoamination product 10.

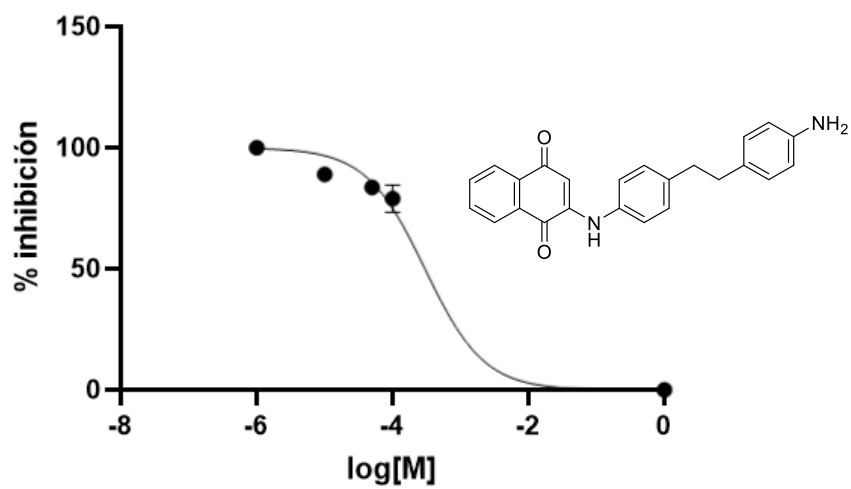

Figure S25. Curve dose-response monoamination product 11.

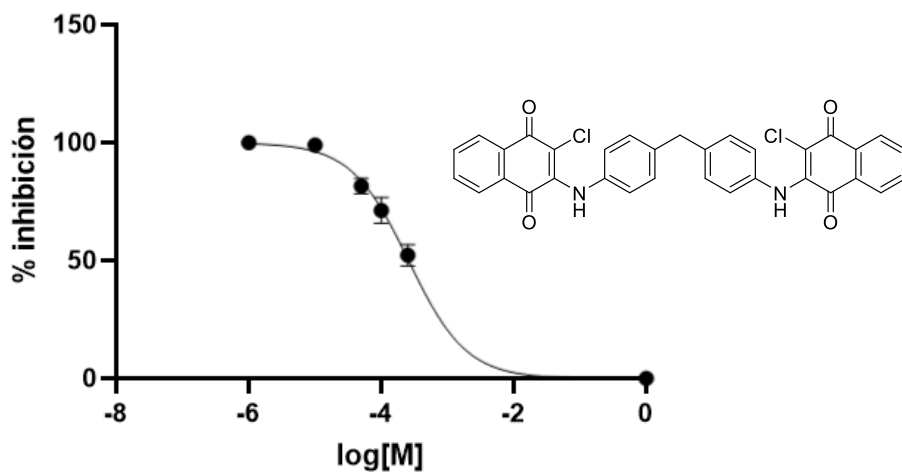

Figure S26. Curve dose-response homodimer 14.

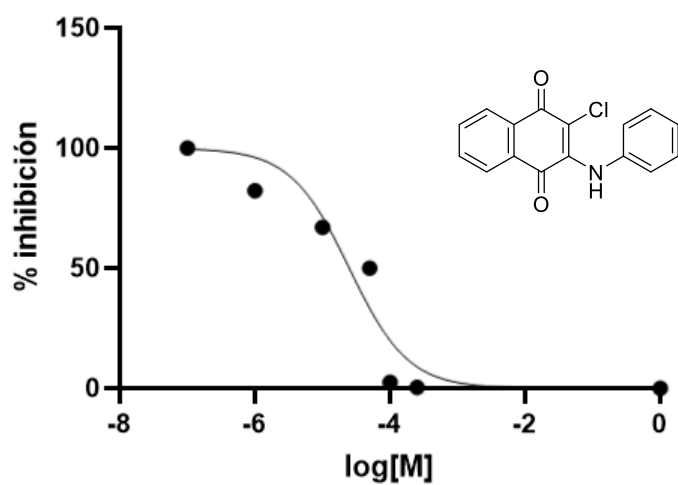

Figure S27. Curve dose-response pharmacophore 18.

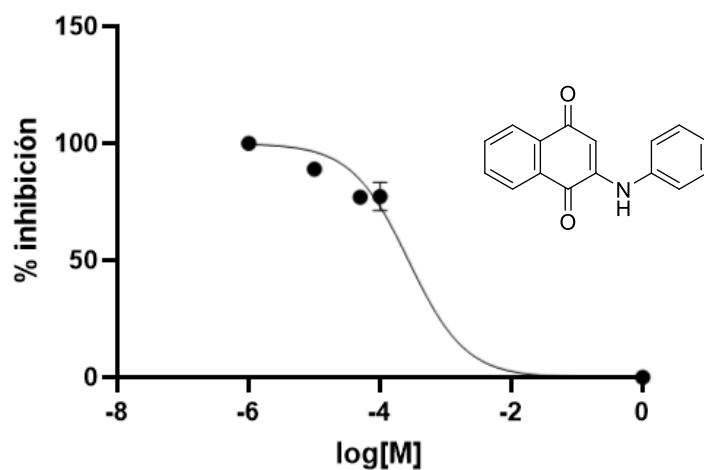

Figure S28. Curve dose-response pharmacophore 19.

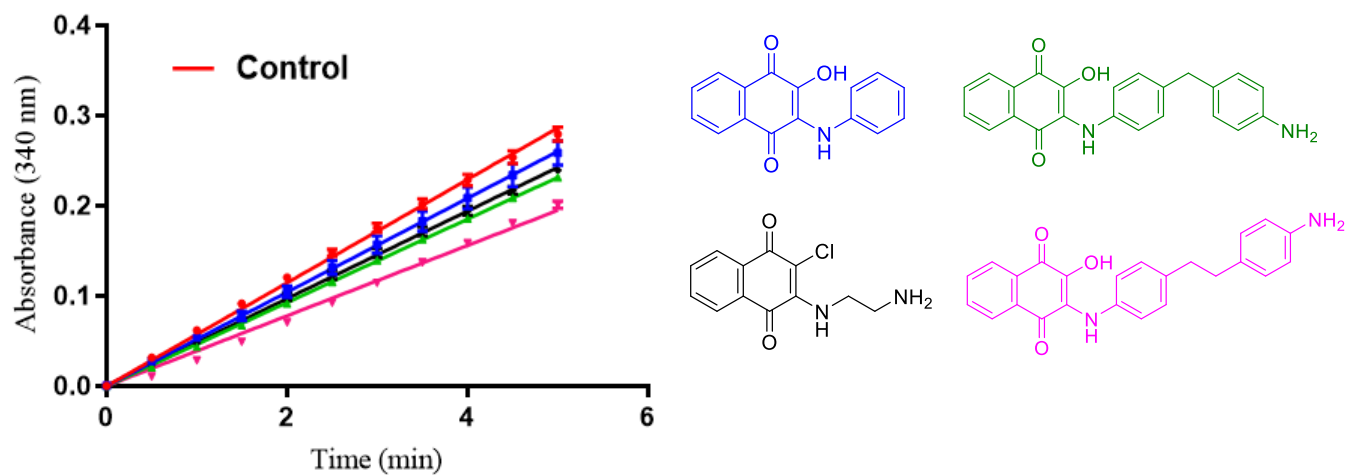

Figure S29. Screening GST activity monoamination products 12 (green), 13 (pink), 21 (black) and pharmacophore 20 (blue).

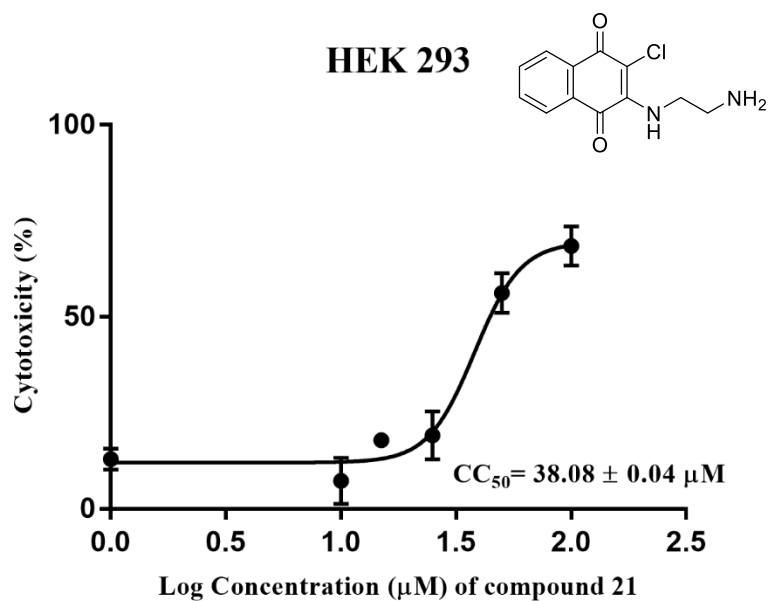

**Figure S30.**  $\text{CC}_{50}$  in HEK293 of monoamination product 21.

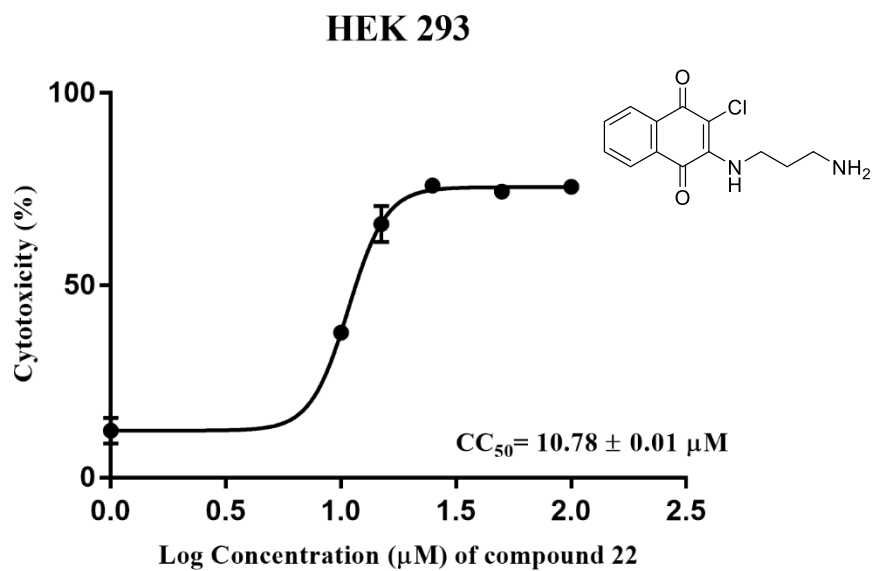

**Figure S31.**  $\text{CC}_{50}$  in HEK293 of monoamination product 22.

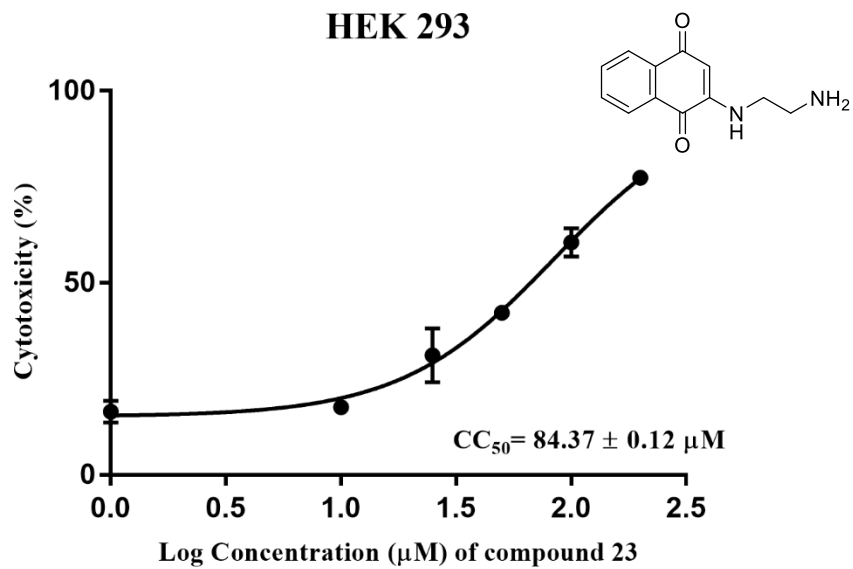

**Figure S32.**  $CC_{50}$  in HEK293 of monoamination product **23**.

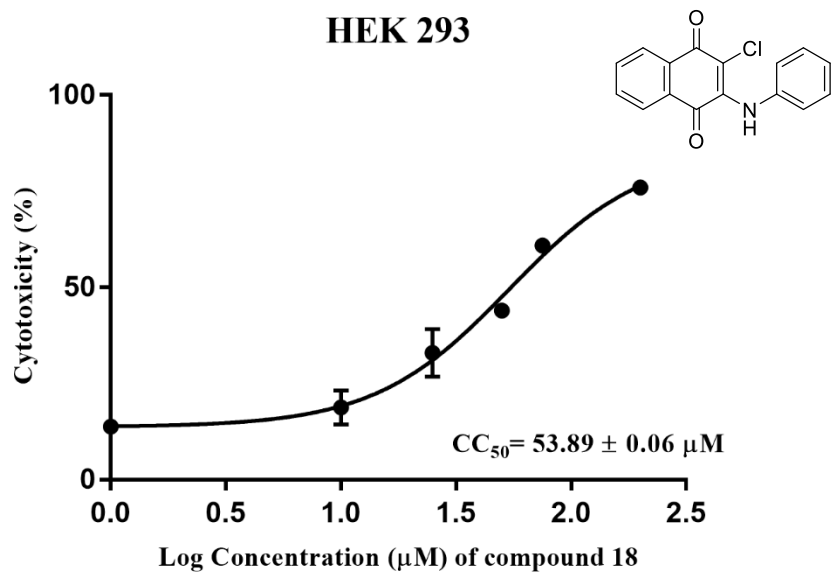

**Figure S33.**  $CC_{50}$  in HEK293 of pharmacophore **18**.

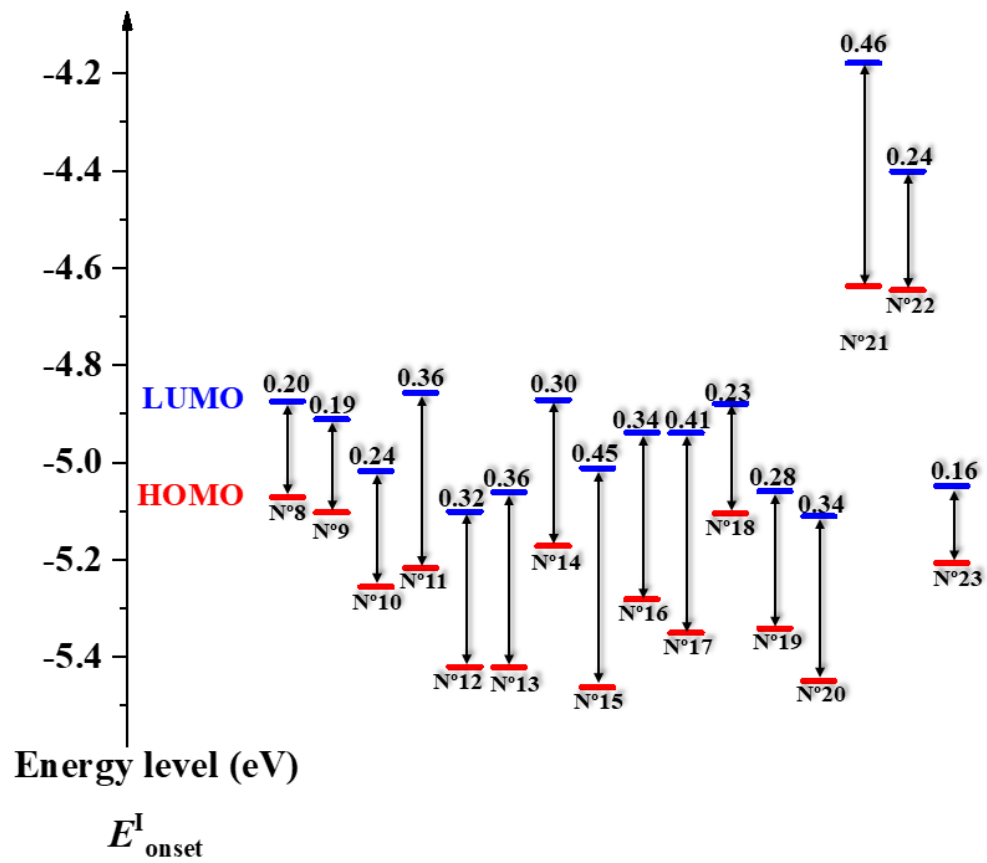

Figure S34. HOMO-LUMO bandgap determined from cyclic voltammetry of each synthesized molecule.
